# Supplementary material for: Diet composition influences the metabolic benefits of short cycles of very low caloric intake
Source: PubMed Central journal article supplement (PMC8578605; doi:10.1038/s41467-021-26654-5), 2021-11-09
Supplement: 41467_2021_26654_MOESM1_ESM.pdf [file 41467_2021_26654_MOESM1_ESM.pdf]

## Supplementary Information

### Diet Composition Determines the Metabolic Benefits of Short Cycles of Very Low Caloric Intake

Alberto Diaz-Ruiz, Tyler Rhinesmith, Laura C.D. Pomatto-Watson, Nathan L. Price, Farzin Eshaghi, Margaux R. Ehrlich, Jacqueline M. Moats, Melissa Carpenter, Annamaria Rudderow, Sebastian Brandhorst, Julie A. Mattison, Miguel A. Aon, Michel Bernier, Valter D. Longo and Rafael de Cabo

#### INDEX

Methods - Description of metabolomics experiment and associated analysis

Supplementary Fig. 1. Impact of 4:10 feeding cycles on mice maintained on HFD

Supplementary Fig. 2. Impact of 4:10 feeding cycles on physiological measurements in mice maintained on HFD

Supplementary Fig. 3. Impact of 4:10 feeding cycles on metabolic and biochemical readouts in mice fed SD

Supplementary Fig. 4. Impact of 4:10 feeding cycles on metabolic and biochemical readouts in mice maintained on HFD

Supplementary Fig. 5. Heatmaps of metabolite profiles in serum and liver from mice on SD

Supplementary Fig. 6. Relative quantitation of metabolites related to purine metabolism in liver from mice on SD and HFD

Supplementary Fig. 7. Heatmaps of metabolite profiles in serum and liver from mice on HFD

Supplementary Table 1. List of serum and liver metabolites significantly impacted by LCC and FMD in mice fed SD and HFD

Supplementary Table 2. Metabolites implicated in the 'Central Core of Fasting' in the serum and liver of mice fed SD and HFD

Supplementary Table 3. Metabolites implicated in the 'Metabolic Memory of Fasting' in the serum and liver of mice fed SD and HFD

Supplementary Table 4. Pathway analysis of shared metabolites in the liver of fasted and refed mice under the indicated experimental conditions

Supplementary Table 5. Composition of the SD and HFD diets.

## Methods

### Description of metabolomics experiment and associated analysis

As described in Petr et al. 2021 (30), tissue and serum were extracted in an acetonitrile:isopropanol:water (3:3:2) solution, vortexed, centrifuged, and the supernatants aliquoted for downstream analysis. After a series of evaporation and reconstitution steps in 50% acetonitrile, internal standards (C08-C30, fatty acid methyl esters) were added to the dried sample, which was then derivatized for trimethylsilylation of acidic protons. Data were acquired using the method as described by Fiehn, 2008 (55) and summed up by Mitchell et al., 2016 (46). In brief, metabolites were measured using a rtx5Sil-MS column (made of 95% dimethyl, 5% diphenyl-polysiloxane coated on fused silica; Restek Corporation; Bellefonte PA) protected by an empty guard column. This chromatography method yields excellent retention and separation of primary metabolite classes (amino acids, hydroxyl acids, carbohydrates, sugar acids, sterols, aromatics, nucleosides, amines, and miscellaneous compounds) with narrow peak widths of 2–3 s and very good within-series retention time reproducibility of better than 0.2 s absolute deviation of retention times. The mobile phase consisted of helium, with a flow rate of 1 mL/min, and injection volume of 0.5mL. The following mass spectrometry parameters were used: a Leco Pegasus IV mass spectrometer with unit mass resolution at 17 spectra s<sup>-1</sup> from 80 to 500 Da at -70 eV for elution of metabolites. As a quality control, for each sequence of sample extractions, one blank negative control was performed by applying the total procedure (e.g., all materials and plastic ware) without biological sample. Result files were transformed by calculating the sum intensities of all structurally identified compounds for each sample, and subsequently dividing all data associated with a sample by the corresponding metabolite sum. The resulting data were multiplied by a constant factor to obtain values without decimal places. Intensities of identified metabolites with more than one peak (e.g., for the syn- and anti-forms of methoximated reducing sugars) were summed to only one value in the transformed data set. The original non-transformed data set was retained. Relative metabolite levels represent the MS peak amplitude normalized with respect to the total metabolites returned, but disregarding unknowns that might potentially comprise artifact peaks or chemical contaminants.

In liver and serum 194 metabolites were detected/identified and subsequently analyzed using MetaboAnalyst versions 3.0 and 4.0 (31, 56), utilizing univariate (ANOVA), clustering (heatmaps), and multivariate (partial least square discriminant, PLSD) built-in analytical methods from modules of this web-based platform, as specified. The autoscaling function of MetaboAnalyst used to normalize the metabolomics data closely resembles the Z ratio expression and requires the detection and removal of outliers. Significantly changed metabolites were determined from the ratio LCC/AL or refeeding/AL both in SD or FMD using as threshold (fold-change up  $\geq 1.2$  or down  $\leq 0.83$ , raw p value  $< 0.05$ ). The same procedure was utilized in HFD diet.

Significantly up- or down-modulated metabolites were represented as Volcano plots. Shared and unique metabolites among dietary interventions were determined according to Venn diagrams. The groups of significantly modified metabolites in liver, shared and unique, were analyzed with the “Pathways Analysis” module of MetaboAnalyst. Metabolic pathways were considered significantly enriched at  $\log p > 2.5$ , and accordingly ranked. When necessary, univariate analysis of individual metabolites was performed using one-way ANOVA with uncorrected Fisher’s LSD comparison test.

## REFERENCES

55. Fiehn, O. Extending the breadth of metabolite profiling by gas chromatography coupled to mass spectrometry. *Trends Analyt. Chem.* 27, 261–269 (2008).
56. Xia, J. & Wishart, D. S. Using MetaboAnalyst 3.0 for comprehensive metabolomics data analysis. *Curr. Protoc. Bioinformatics* 55, 14.10.1-14.10.91 (2016).

## Figure Legends

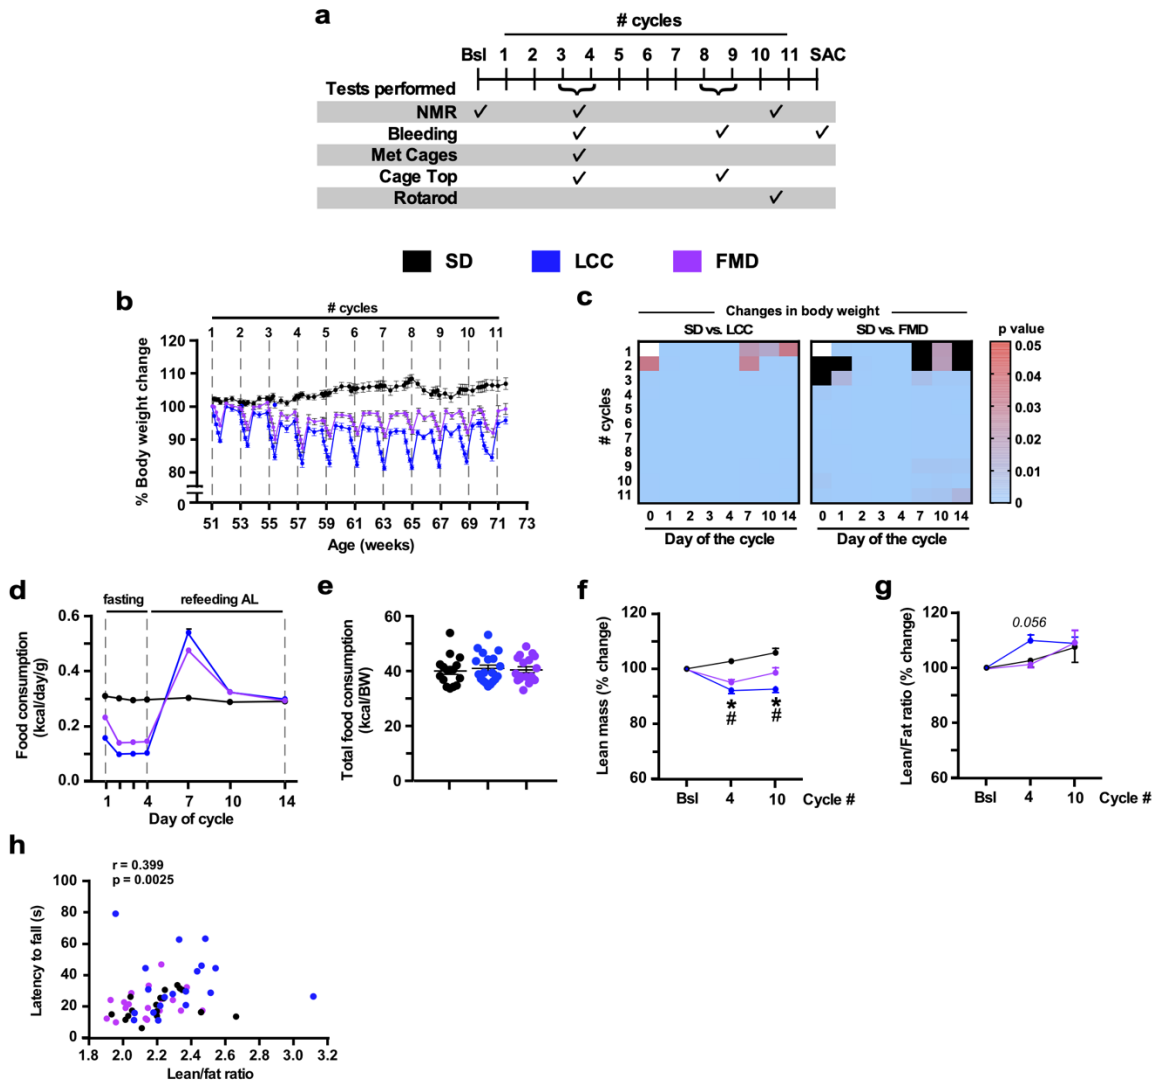

Supplementary Fig. 1, related to Fig. 1. Impact of 4:10 feeding cycles on physiological measurements in mice. **a** Timeline for procedures and functional tests. Bsl, baseline; SAC, sacrifice. **b-h** *Ad libitum* standard diet (SD, black symbols), LCC (blue symbols), and FMD (purple symbols). **b** High-resolution body weight (BW) trajectories over the course of the study (SD, n = 16-18; LCC, n = 19; FMD, n = 17-18); **c** Significant difference in body weight between AL and 4:10 groups of mice (LCC, left panel; FMD, right panel) at each day of the cycle for a total of 11 cycles, ranging from orange color,  $p < 0.05$ , to blue color,  $p < 0.001$ ; not significant (black); **d** Average daily food consumption (kCal) during each cycle (n = 11 cycles) normalized to body weight; **e** Cumulative food consumption throughout the study after normalization to body weight (SD, n = 16; LCC, n = 19; FMD, n = 18). **f, g** Percent changes in **f** lean

mass content and **g** lean-to-fat ratio from baseline at cycles 4 and 10. Comparison by two-tailed t test; \* $p < 0.05$  vs. SD. Measurements were carried out during the re-fed period of the indicated cycle (SD,  $n = 15/15/13$ ; LCC,  $n = 17/17/15$ ; FMD,  $n = 16$ ). **h** Spearman correlation between latency to fall during cage top test and lean-to-fat ratio at cycle 4.  $n = 13-17$  per group. All data are expressed as mean  $\pm$  SEM.

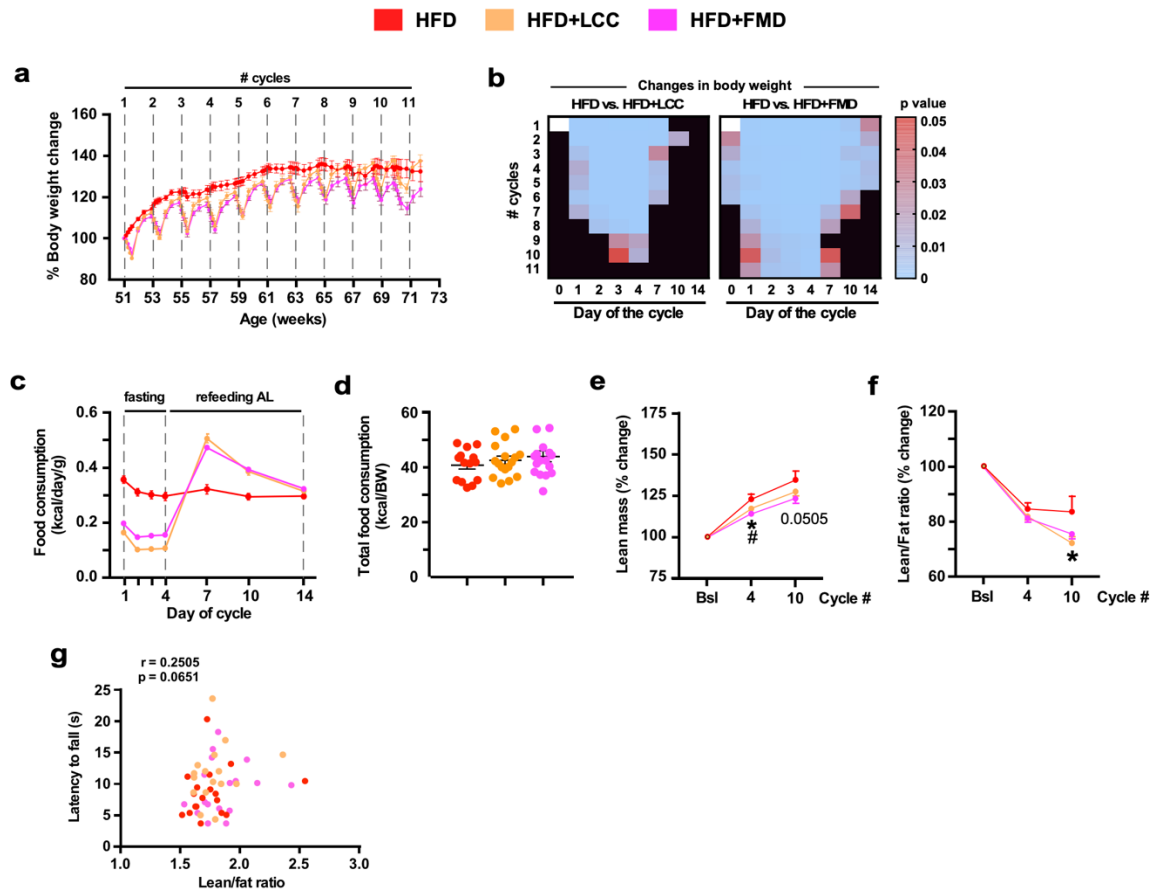

Supplementary Fig. 2, related to Fig. 2. Impact of 4:10 feeding cycles on physiological measurements in mice maintained on HFD. a-g *Ad libitum* HFD (red symbols), HFD+LCC (orange symbols), and HFD+FMD (pink symbols). **a** High-resolution BW trajectories over the course of the study (HFD, n = 16-19; HFD+LCC and HFD+FMD, n = 17-18 per group); **b** Significant difference in body weight between AL and 4:10 groups (HFD+LCC, left panel; HFD+FMD, right panel) at each day over the course of the study, ranging from orange color,  $p < 0.05$ , to blue color,  $p < 0.001$ ; not significant (black). **c** Average daily food consumption (kCal) during each cycle (n = 11 cycles) normalized to body weight. **d** Cumulative food consumption throughout the study after normalization to body weight (HFD, n = 14; HFD+LCC, n = 17; HFD+FMD, n = 18). **e** Percent changes in lean mass content and **f** lean-to-fat ratio from baseline at cycles 4 and 10. Comparison by two-tailed t-test; \* $p < 0.05$  vs. HFD (HFD, n = 17/16/13; HFD+LCC, n = 15/15/13; HFD+FMD, n = 14/14/11). Measurements were carried out during the re-fed period of the indicated cycle. **g** Spearman correlation between latency to fall during cage top test and lean-to-fat ratio at cycle 4. All data are expressed as mean  $\pm$  SEM.

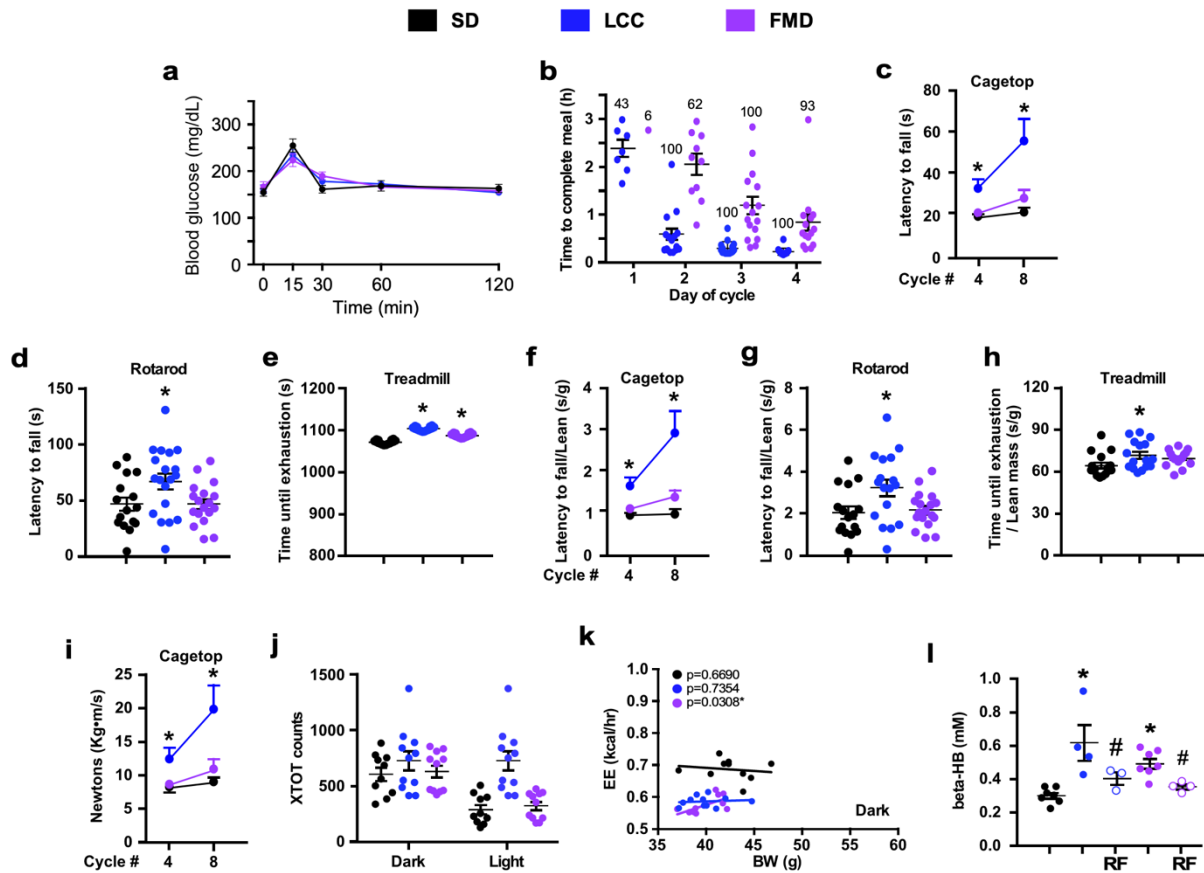

Supplementary Fig. 3, related to Fig. 3. Impact of 4:10 feeding cycles on metabolic and biochemical readouts in mice maintained on SD. **a** Blood glucose levels were measured over a period of 2 h during an OGTT, n=8 per group. OGTT was performed during the refeeding period. **b** Time required to eat daily portion of food on days 1-4 of the second cycle. Observations were made every two min for 3 h. Data was collected from an independent cohort of 20-week-old C57BL6/J male mice on LCC and FMD diet (LCC, n = 7 for day 1 and 16 for days 2-4; FMD, n = 1, 10, 16 and 15 for days 1-4, respectively). **c-e** All physical performance values were expressed as latency to fall (seconds) without body weight normalization. **c** Inverted cage top tests were conducted on days 10-13 of cycles 4 and 8 (SD, n = 18/17; LCC, n = 19/19; FMD, n = 18/18); **d** Rotarod tests were conducted on day 11 of cycle 8. (SD, n = 16; LCC, n = 19; FMD, n = 18); **e** Treadmill endurance test during the re-feeding period of cycle. Data were collected from an independent cohort of mice (n = 16) at the age of 26 weeks. **f-h** All physical performance values were expressed as latency to fall (seconds) and normalized by lean body mass in grams or **i** expressed as kg-m/sec - also known as newtons (SD, n = 18/16; LCC, n = 19/17; FMD, n = 18/18). **g** Rotarod tests (SD, n = 16; LCC, n = 17; FMD, n = 18). **h** Treadmill endurance tests (n = 16). **i**, Inverted cage top tests expressed kg\*m/sec – also known as newtons (SD, n =

18/17; LCC, n = 19/19; FMD, n = 18/18). **j, k** Mice were placed into metabolic cages during cycles 3 and 4 to measure **j** average activity counts in the X-axis and **k** Energy Expenditure (EE), which was then plotted in function of body weight (BW in grams) and analyzed by ANCOVA (SD, n = 10; LCC and FMD, n = 11). \*p < 0.05. **l**  $\beta$ -hydroxybutyrate levels measured from serum collected at the time of sacrifice (sac). (SD, n = 7; LCC, n=4; LCC-RF, n=3; FMD, n=7; FMD-RF, n=4). All data are expressed as mean  $\pm$  SEM. Comparison by one-way ANOVA unless otherwise noted; \*, p < 0.05 vs. SD; #, p < 0.05 vs. LCC or FMD, respectively.



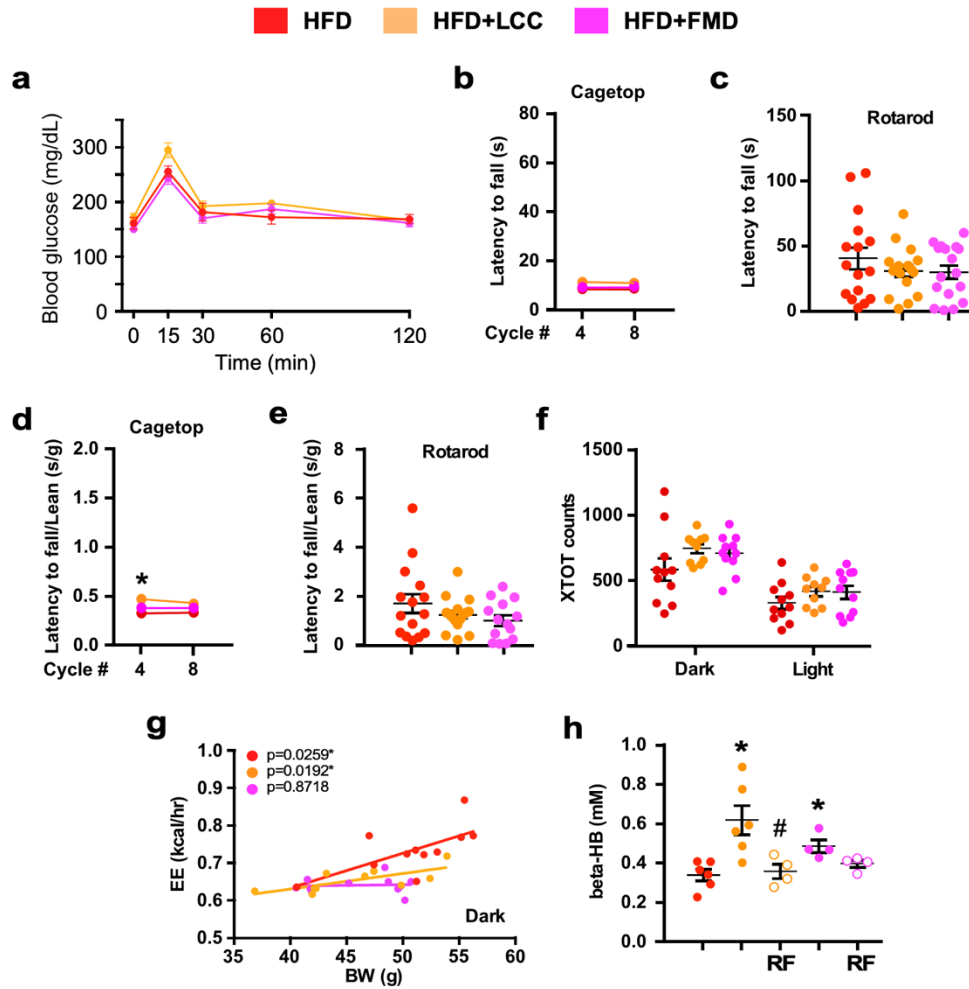

Supplementary Fig. 4, related to Fig. 4. Impact of 4:10 feeding cycles on metabolic and biochemical readouts in mice maintained on HFD. **a** Blood glucose levels were measured over a period of 2 h during an OGTT, n=8 per group. OGTT was performed during the refeeding period. **b, c** All physical performance values were expressed as latency to fall (seconds) without body weight normalization. **b** Inverted cage top tests were conducted on days 10-13 of cycles 4 and 8 (HFD, HFD+LCC and HFD+FMD, n = 18/17 per group); **c** Rotarod tests were conducted on day 11 of cycle 8. (HFD, n = 16; HFD+LCC, n = 17; HFD+FMD, n = 17). **d, e** All physical performance values were expressed as latency to fall (seconds) and normalized by lean body mass in grams. **d** Inverted cage top tests (HFD, n = 18/15; HFD+LCC, n = 18/16; HFD+FMD, n = 18/14). **e** Rotarod tests (HFD, HFD+LCC and HFD+FMD, n = 16 per group). **f, g** Mice fed HFD were placed into metabolic cages during cycles 3 and 4 to measure **f** average activity counts in the X-axis and **g** Energy Expenditure (EE), which was then plotted in function of body weight (BW in grams) and analyzed by ANCOVA (HFD, n = 11; HFD+LCC, n = 10;

HFD+FMD, n = 11). \*p < 0.05. **h**  $\beta$ -hydroxybutyrate levels measured from serum collected at the time of sacrifice (sac) (HFD, n = 6; HFD+LCC, n = 6; HFD+LCC-RF, n=4; HFD+FMD and HFD+FMD-RF, n = 4). All data are expressed as mean  $\pm$  SEM. Comparison by one-way ANOVA unless otherwise noted; \*, p < 0.05 vs. SD; #, p < 0.05 vs. LCC or FMD, respectively.

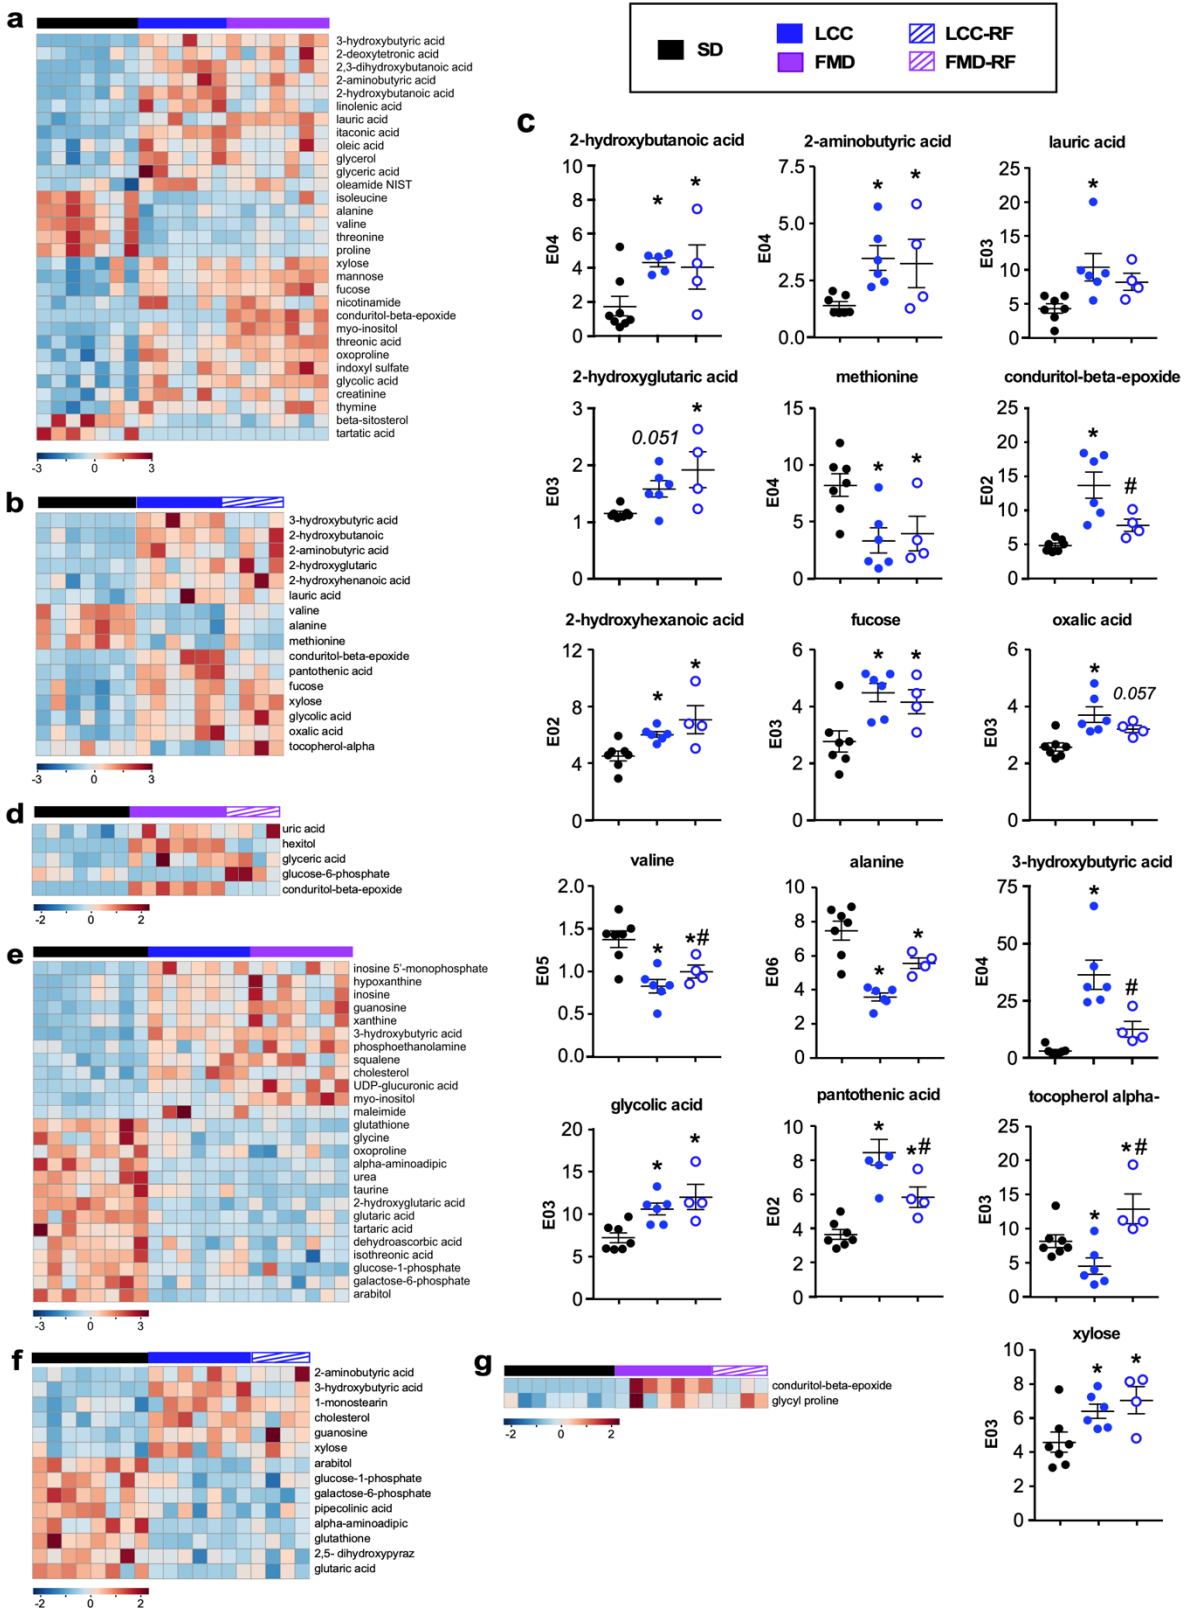

Supplementary Fig. 5, related to Fig. 5 and 6. Heatmaps of metabolite profiles in serum and liver from mice on SD. **a-d** Untargeted metabolite profiling performed in serum of mice on SD. Metabolites that account for the separation between the metabolite profiles obtained from the Volcano plots were used to generate heatmaps. These heatmaps depict relative metabolite levels of individual animals. SD-fed mice on AL (black bar, n=7), LCC and FMD mice after 3 days of severe calorie restriction (blue/purple bar, n=6/7), LCC-RF and FMD-RF animals after 6 days of refeeding (hatched blue/purple bar, n=4/4). The color coding denotes the range of relative accumulation (red) to depletion (blue) for each metabolite. **a** Related to Fig. 3d, ‘central core of fasting’ in serum; **b, c** Related to Fig. 3h, ‘selective metabolic memory’ in LCC mice. Relative quantitation of selected metabolites in panel **c** were compared by one-way ANOVA. Results are expressed as mean  $\pm$  SEM. \*,  $p < 0.05$  vs. SD; #,  $p < 0.05$  vs. LCC; **d** Related to Fig. 3j, FMD mice. **e-g** Untargeted metabolite profiling performed in livers of mice on SD. SD-fed mice on AL (black bar, n=8), LCC and FMD mice after 3 days of severe calorie restriction (blue/purple bar, n=7/7), LCC-RF and FMD-RF animals after 6 days of refeeding (hatched blue/purple bar, n=4/4). **e** Related Fig. 3n, ‘central core of fasting’ in liver; **f** Related to Fig. 3r, ‘selective metabolic memory’ in LCC mice; **g** Related to Fig. 3t, FMD mice.

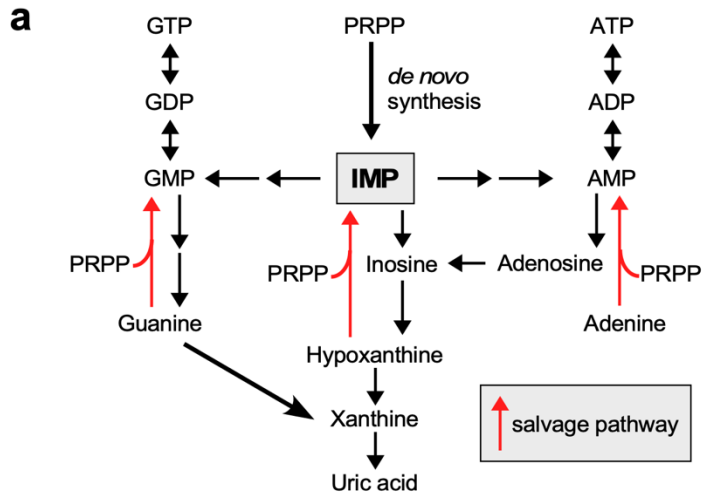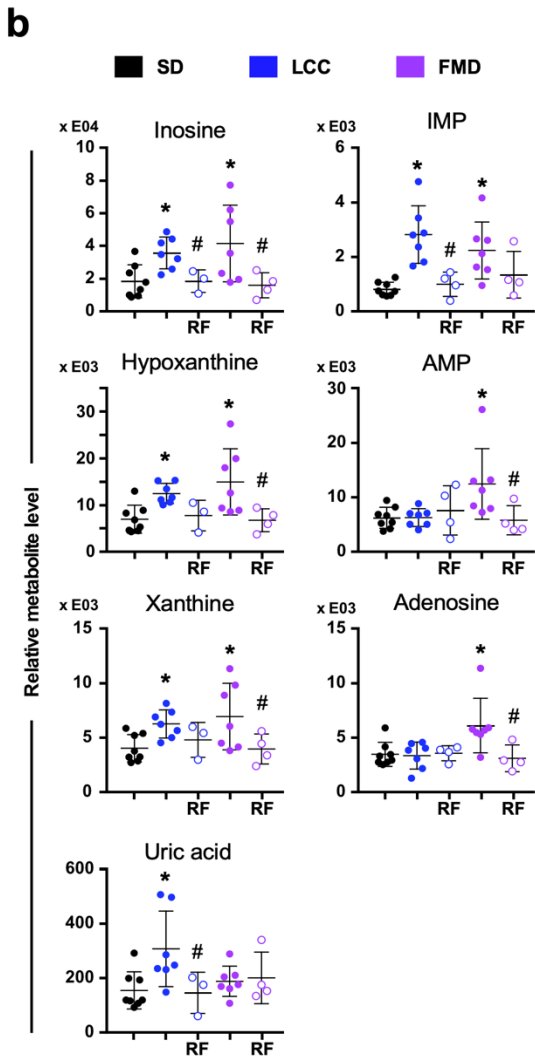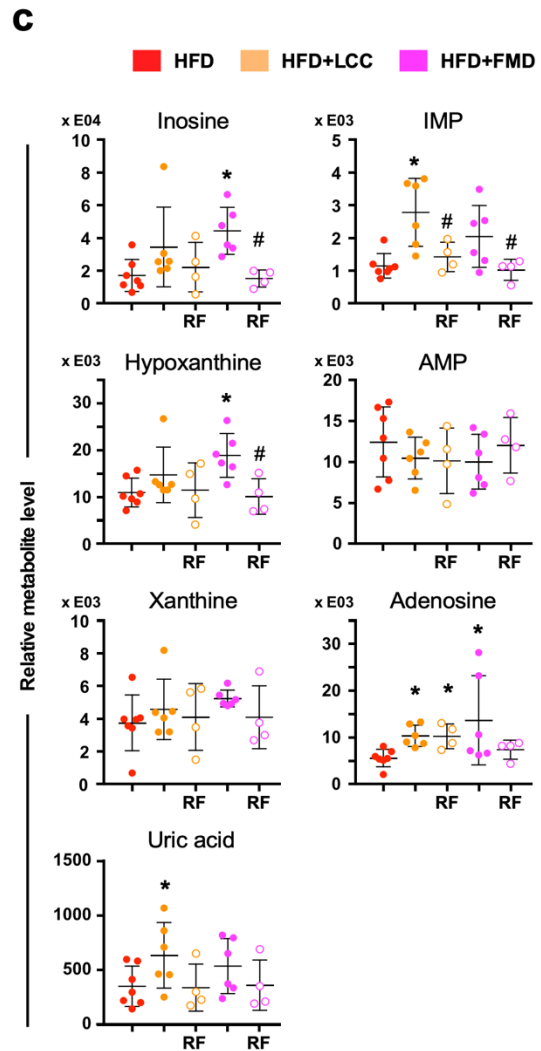

Supplementary Fig. 6, related to Fig. 6 and 8. Relative quantitation of metabolites related to purine metabolism in liver from mice on SD and HFD. **a** Schematic representation of de novo and salvage pathways for purine synthesis. **b, c** One-way ANOVA analysis of relative levels of selected metabolites in liver from mice on **b** SD and **c** HFD diet under three feeding regimens. AL feeding (SD and HFD), 3 days of severe calorie restriction (LCC, FMD, HFD+LCC and HFD+FMD), and 6 days of refeeding (LCC-RF, FMD-RF, HFD+LCC-RF and HFD+FMD-RF). SD, n = 8; LCC, n=7; LCC-RF, n=3-4; FMD, n = 7; FMD-RF, n=4; HFD, n = 7; HFD+LCC, n = 6; HFD+LCC-RF, n=4; HFD+FMD, n = 6; HFD+FMD-RF, n=4). Results are expressed as mean  $\pm$  SD. \*, p < 0.05 vs. SD or HFD; #, p < 0.05 vs. LCC, FMD, HFD+LCC or HFD+FMD.

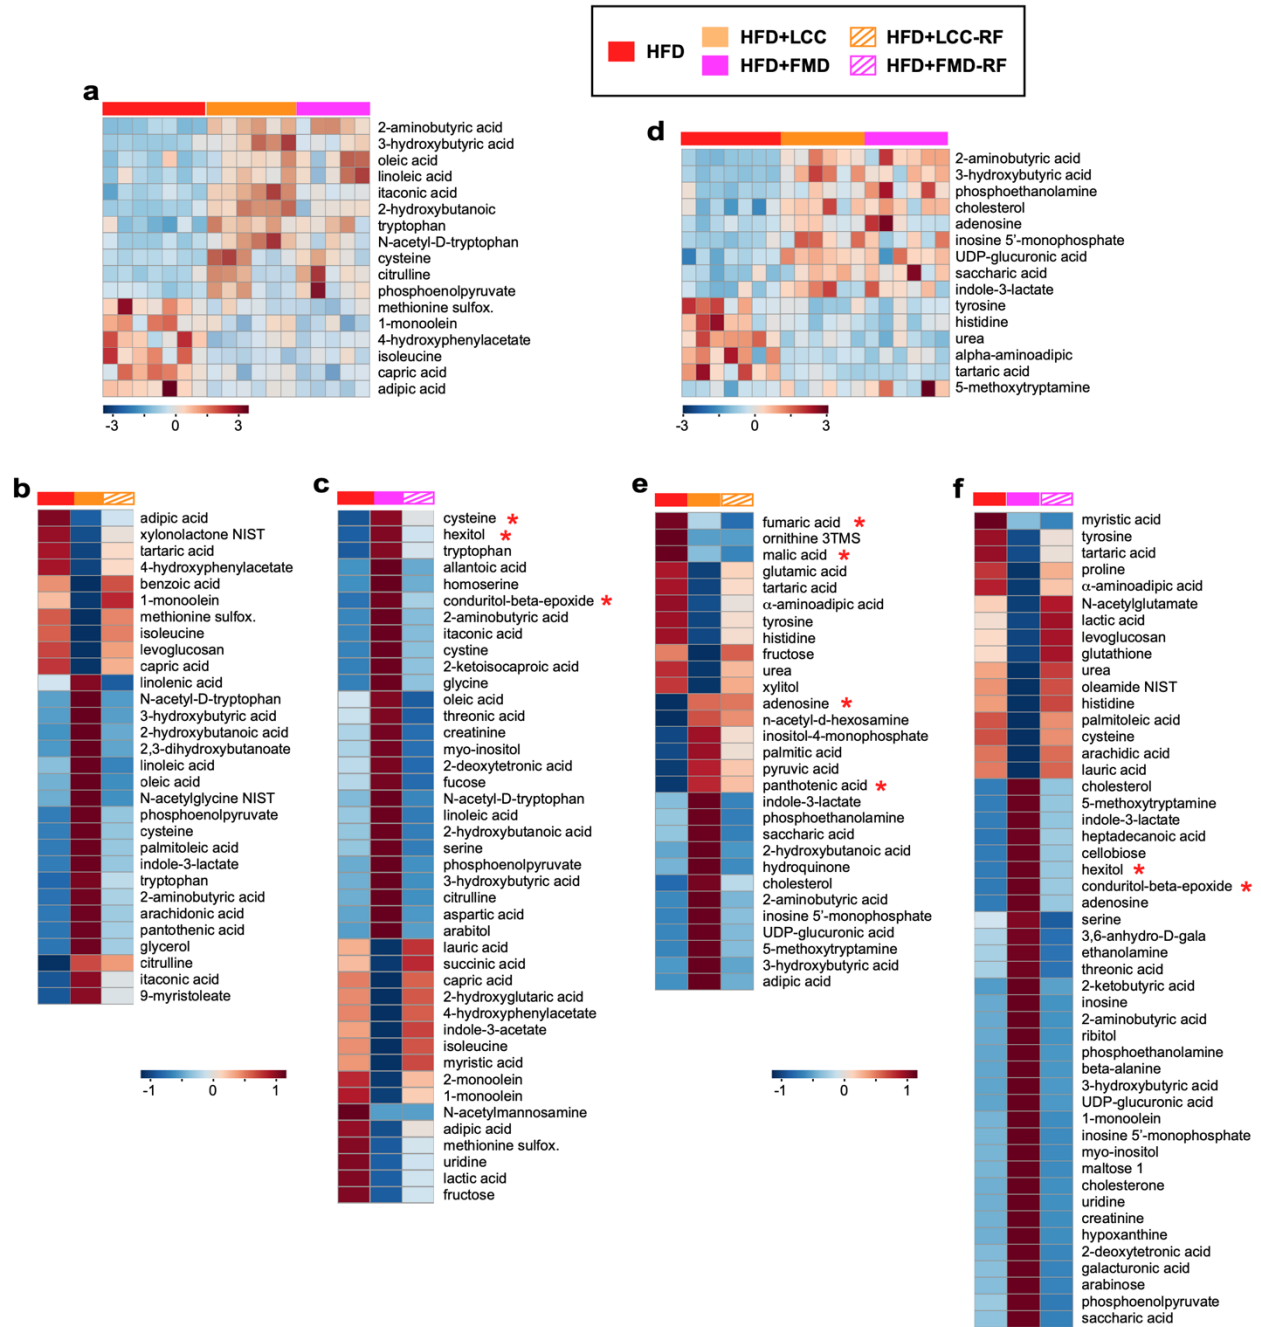

Supplementary Fig. 7, related to Fig. 7 and 8. Heatmaps of metabolite profiles in serum and liver from mice on HFD. **a-c** Untargeted metabolite profiling was performed in serum and liver of mice on HFD. Metabolites that account for the separation between the metabolite profiles obtained from the Volcano plots were used to generate heatmaps. Heatmaps depict relative metabolite levels of **a** individual animals or **b, c** averaged signal. HFD-fed mice on AL (red bar, n=7), LCC and FMD mice on HFD after 3 days of severe calorie restriction (tangerine/magenta bar, n=6/5), LCC-RF and FMD-RF on HFD after 6 days of refeeding (hatched tangerine/magenta bar, n=4/4). The color coding denotes the range of relative

accumulation (red) to depletion (blue) for each metabolite. **a** Related to Fig 4**d**, ‘central core of fasting’ in serum; **b, c** Related to Figs. 4**a** and 4**b**, metabolites impacted by 3 days of severe low-calorie intake in **b** HFD+LCC or **c** HFD+FMD mice. Red asterisks indicate metabolites also present after refeeding. **d-f** Untargeted metabolite profiling performed in livers of mice on HFD. HFD-fed mice on AL (red bar, n=7), LCC and FMD mice on HFD after 3 days of severe calorie restriction (tangerine/magenta bar, n=6/6), LCC-RF and FMD-RF on HFD after 6 days of refeeding (hatched tangerine/magenta bar, n=4/4). **d** Related to Fig. 4**i**, ‘central core of fasting’ in liver; **e, f** Related to Figs. 4**i** and 4**j**, hepatic metabolites impacted by 3 days of severe low-calorie intake in **e** HFD+LCC mice or **f** HFD+FMD mice. Red asterisks indicate metabolites also present after refeeding.

Note regarding Supplementary Tables 1-3: 194 metabolites were analyzed using MetaboAnalyst versions 3.0 and 4.0 (31, 56). Significantly changed metabolites were determined from the ratio LCC/AL or refeeding/AL both in SD or FMD using as threshold (fold-change up  $\geq 1.2$  or down  $\leq 0.83$ , raw p value  $< 0.05$ ). The same procedure was utilized in HFD diet. Supplementary Table 4: Pathway analysis was carried out using MetaboAnalyst 4.0. Significantly changed pathways were determined using a threshold ( $\log p > 2.5$



Supplementary Table 1. List of serum and liver metabolites significantly impacted by LCC and FMD in mice fed SD and HFD.

| Biological Sample | Pairwise Comparison    | Metabolite                      | FC                              | log2(FC) | raw.pval | -LOG10(p) |      |
|-------------------|------------------------|---------------------------------|---------------------------------|----------|----------|-----------|------|
| Serum             | LCC vs SD              | 3-hydroxybutyric acid           | 14.04                           | 3.81     | 1.59E-04 | 3.80      |      |
| Serum             |                        | linolenic acid                  | 4.57                            | 2.19     | 1.03E-03 | 2.99      |      |
| Serum             |                        | hypoxanthine                    | 4.18                            | 2.06     | 9.67E-03 | 2.01      |      |
| Serum             |                        | 2,3-dihydroxybutanoic acid NIST | 3.55                            | 1.83     | 7.74E-06 | 5.11      |      |
| Serum             |                        | xanthine                        | 3.46                            | 1.79     | 2.14E-02 | 1.67      |      |
| Serum             |                        | 2-hydroxybutanoic acid          | 3.26                            | 1.70     | 1.58E-05 | 4.80      |      |
| Serum             |                        | cholesterone                    | 2.95                            | 1.56     | 2.28E-02 | 1.64      |      |
| Serum             |                        | conduritol-beta-expoxide        | 2.79                            | 1.48     | 4.59E-04 | 3.34      |      |
| Serum             |                        | lauric acid                     | 2.65                            | 1.41     | 1.18E-02 | 1.93      |      |
| Serum             |                        | itaconic acid                   | 2.60                            | 1.38     | 3.20E-06 | 5.50      |      |
| Serum             |                        | 2-aminobutyric acid             | 2.40                            | 1.26     | 2.44E-03 | 2.61      |      |
| Serum             |                        | indole-3-lactate                | 2.34                            | 1.23     | 3.65E-06 | 5.44      |      |
| Serum             |                        | pantothenic acid                | 2.29                            | 1.20     | 5.54E-05 | 4.26      |      |
| Serum             |                        | palmitoleic acid                | 2.21                            | 1.14     | 7.98E-03 | 2.10      |      |
| Serum             |                        | myo-inositol                    | 2.07                            | 1.05     | 2.65E-03 | 2.58      |      |
| Serum             |                        | ribonic acid                    | 1.98                            | 0.98     | 1.02E-02 | 1.99      |      |
| Serum             |                        | mannose                         | 1.81                            | 0.85     | 1.99E-02 | 1.70      |      |
| Serum             |                        | 9-myristoleate                  | 1.80                            | 0.85     | 7.14E-03 | 2.15      |      |
| Serum             |                        | glyceric acid                   | 1.78                            | 0.83     | 1.30E-02 | 1.89      |      |
| Serum             |                        | oleic acid                      | 1.77                            | 0.83     | 1.08E-02 | 1.97      |      |
| Serum             |                        | indoxyl sulfate                 | 1.76                            | 0.81     | 3.76E-03 | 2.42      |      |
| Serum             |                        | creatinine                      | 1.75                            | 0.81     | 7.96E-03 | 2.10      |      |
| Serum             |                        | fucose                          | 1.63                            | 0.70     | 5.86E-03 | 2.23      |      |
| Serum             |                        | urocanic acid                   | 1.56                            | 0.64     | 2.87E-02 | 1.54      |      |
| Serum             |                        | 2-deoxytetroneic acid           | 1.55                            | 0.63     | 1.40E-02 | 1.85      |      |
| Serum             |                        | nicotinamide                    | 1.52                            | 0.60     | 3.49E-02 | 1.46      |      |
| Serum             |                        | glycerol                        | 1.52                            | 0.60     | 6.00E-03 | 2.22      |      |
| Serum             |                        | galactonic acid                 | 1.51                            | 0.60     | 2.27E-02 | 1.64      |      |
| Serum             |                        | threonic acid                   | 1.49                            | 0.58     | 2.84E-03 | 2.55      |      |
| Serum             |                        | glycolic acid                   | 1.48                            | 0.56     | 3.15E-03 | 2.50      |      |
| Serum             |                        | oleamide NIST                   | 1.47                            | 0.56     | 1.60E-02 | 1.80      |      |
| Serum             |                        | oxalic acid                     | 1.45                            | 0.54     | 2.81E-03 | 2.55      |      |
| Serum             |                        | thymine                         | 1.45                            | 0.53     | 2.73E-02 | 1.56      |      |
| Serum             |                        | xylose                          | 1.40                            | 0.48     | 3.30E-02 | 1.48      |      |
| Serum             |                        | oxoproline                      | 1.38                            | 0.47     | 2.79E-03 | 2.56      |      |
| Serum             |                        | 2-hydroxyglutaric acid          | 1.37                            | 0.46     | 9.50E-03 | 2.02      |      |
| Serum             |                        | 2-hydroxyhexanoic acid          | 1.34                            | 0.43     | 3.91E-03 | 2.41      |      |
| Serum             |                        | N-acetyl-D-tryptophan           | 1.28                            | 0.35     | 4.20E-02 | 1.38      |      |
| Serum             |                        | glutamine                       | 0.82                            | -0.29    | 4.01E-02 | 1.40      |      |
| Serum             |                        | alpha-aminoadipic acid          | 0.74                            | -0.43    | 2.14E-02 | 1.67      |      |
| Serum             |                        | leucine                         | 0.70                            | -0.52    | 1.25E-02 | 1.90      |      |
| Serum             |                        | tyrosine                        | 0.70                            | -0.52    | 3.79E-02 | 1.42      |      |
| Serum             |                        | isoleucine                      | 0.61                            | -0.71    | 4.50E-04 | 3.35      |      |
| Serum             |                        | alanine                         | 0.60                            | -0.74    | 1.30E-03 | 2.89      |      |
| Serum             |                        | 4-hydroxyphenylacetic acid      | 0.58                            | -0.78    | 4.66E-02 | 1.33      |      |
| Serum             |                        | tocopherol alpha-               | 0.56                            | -0.84    | 3.23E-02 | 1.49      |      |
| Serum             |                        | threonine                       | 0.53                            | -0.92    | 8.48E-04 | 3.07      |      |
| Serum             |                        | beta-sitosterol                 | 0.51                            | -0.97    | 2.03E-02 | 1.69      |      |
| Serum             |                        | valine                          | 0.48                            | -1.07    | 8.28E-05 | 4.08      |      |
| Serum             |                        | methionine                      | 0.41                            | -1.28    | 7.30E-03 | 2.14      |      |
| Serum             |                        | proline                         | 0.31                            | -1.67    | 3.97E-03 | 2.40      |      |
| Serum             |                        | tartaric acid                   | 0.04                            | -4.56    | 5.58E-03 | 2.25      |      |
| Serum             |                        | LCC vs HFD                      | conduritol-beta-expoxide        | 27.41    | 4.78     | 4.02E-09  | 8.40 |
| Serum             |                        |                                 | hexitol                         | 14.65    | 3.87     | 1.28E-09  | 8.89 |
| Serum             |                        |                                 | 3-hydroxybutyric acid           | 14.34    | 3.84     | 1.08E-06  | 5.97 |
| Serum             |                        |                                 | lauric acid                     | 4.18     | 2.06     | 1.26E-07  | 6.90 |
| Serum             |                        |                                 | myo-inositol                    | 3.44     | 1.78     | 3.46E-06  | 5.46 |
| Serum             |                        |                                 | 2,3-dihydroxybutanoic acid NIST | 2.69     | 1.43     | 3.36E-04  | 3.47 |
| Serum             |                        |                                 | allantoic acid                  | 2.55     | 1.35     | 6.13E-03  | 2.21 |
| Serum             |                        |                                 | linolenic acid                  | 2.33     | 1.22     | 4.45E-02  | 1.35 |
| Serum             |                        |                                 | mannose                         | 2.32     | 1.21     | 3.38E-04  | 3.47 |
| Serum             |                        |                                 | itaconic acid                   | 2.16     | 1.11     | 6.58E-04  | 3.18 |
| Serum             |                        |                                 | 2-aminobutyric acid             | 2.15     | 1.11     | 5.92E-04  | 3.23 |
| Serum             | gluconic acid          |                                 | 2.01                            | 1.00     | 4.32E-04 | 3.37      |      |
| Serum             | 2-hydroxybutanoic acid |                                 | 1.97                            | 0.98     | 1.00E-02 | 2.00      |      |
| Serum             | fucose                 |                                 | 1.94                            | 0.95     | 4.17E-04 | 3.38      |      |
| Serum             | indoxyl sulfate        |                                 | 1.90                            | 0.93     | 5.78E-03 | 2.24      |      |
| Serum             | isohexonic acid        |                                 | 1.85                            | 0.89     | 3.01E-04 | 3.52      |      |
| Serum             | saccharic acid         |                                 | 1.85                            | 0.89     | 1.35E-03 | 2.87      |      |
| Serum             | threonic acid          |                                 | 1.82                            | 0.86     | 1.38E-05 | 4.86      |      |
| Serum             | 2-deoxytetroneic acid  |                                 | 1.80                            | 0.85     | 1.97E-02 | 1.71      |      |

|       |              |                           |      |       |          |      |
|-------|--------------|---------------------------|------|-------|----------|------|
| Serum |              | citric acid               | 1.77 | 0.82  | 9.27E-04 | 3.03 |
| Serum |              | glutathione               | 1.66 | 0.73  | 1.19E-02 | 1.93 |
| Serum |              | glycolic acid             | 1.62 | 0.69  | 4.63E-05 | 4.33 |
| Serum |              | sorbitol                  | 1.61 | 0.68  | 3.89E-02 | 1.41 |
| Serum |              | cystine                   | 1.61 | 0.68  | 1.87E-02 | 1.73 |
| Serum |              | isocitric acid            | 1.61 | 0.68  | 6.71E-03 | 2.17 |
| Serum |              | phosphoethanolamine       | 1.60 | 0.68  | 4.59E-02 | 1.34 |
| Serum | FMD vs. SD   | xylitol                   | 1.60 | 0.68  | 4.78E-02 | 1.32 |
| Serum |              | oleic acid                | 1.60 | 0.67  | 4.13E-02 | 1.38 |
| Serum |              | nicotinamide              | 1.56 | 0.64  | 2.61E-03 | 2.58 |
| Serum |              | pseudo uridine            | 1.54 | 0.62  | 1.76E-02 | 1.75 |
| Serum |              | creatinine                | 1.54 | 0.62  | 1.27E-02 | 1.89 |
| Serum |              | xylose                    | 1.48 | 0.57  | 9.92E-03 | 2.00 |
| Serum |              | 2-ketobutyric acid        | 1.48 | 0.56  | 1.28E-03 | 2.89 |
| Serum |              | thymine                   | 1.46 | 0.54  | 3.23E-02 | 1.49 |
| Serum |              | N-acetylglycine NIST      | 1.40 | 0.48  | 2.00E-02 | 1.70 |
| Serum |              | oxoproline                | 1.39 | 0.47  | 2.51E-04 | 3.60 |
| Serum |              | N-acetylglutamate         | 1.37 | 0.45  | 1.61E-04 | 3.79 |
| Serum |              | glyceric acid             | 1.36 | 0.44  | 1.59E-02 | 1.80 |
| Serum |              | trans-4-hydroxy-L-proline | 1.35 | 0.43  | 8.19E-03 | 2.09 |
| Serum |              | glycerol                  | 1.33 | 0.41  | 1.43E-02 | 1.84 |
| Serum |              | uric acid                 | 1.32 | 0.40  | 4.97E-03 | 2.30 |
| Serum |              | oleamide NIST             | 1.31 | 0.39  | 4.09E-02 | 1.39 |
| Serum |              | ethanol phosphate NIST    | 1.31 | 0.39  | 4.89E-02 | 1.31 |
| Serum |              | ethanolamine              | 1.27 | 0.34  | 3.56E-02 | 1.45 |
| Serum |              | isoleucine                | 0.76 | -0.40 | 2.87E-02 | 1.54 |
| Serum |              | alanine                   | 0.63 | -0.66 | 8.58E-04 | 3.07 |
| Serum |              | valine                    | 0.61 | -0.71 | 6.13E-04 | 3.21 |
| Serum |              | threonine                 | 0.61 | -0.71 | 1.49E-03 | 2.83 |
| Serum |              | beta-sitosterol           | 0.53 | -0.92 | 1.99E-02 | 1.70 |
| Serum |              | dihydrocholesterol        | 0.40 | -1.33 | 1.86E-02 | 1.73 |
| Serum |              | proline                   | 0.39 | -1.36 | 4.35E-03 | 2.36 |
| Serum |              | glucose-6-phosphate       | 0.31 | -1.71 | 1.32E-03 | 2.88 |
| Serum |              | p-tolyl glucuronide       | 0.22 | -2.21 | 5.03E-03 | 2.30 |
| Serum |              | tartaric acid             | 0.04 | -4.62 | 2.82E-03 | 2.55 |
| Serum |              | 3-hydroxybutyric acid     | 4.72 | 2.24  | 5.97E-03 | 2.22 |
| Serum |              | 2-hydroxybutanoic acid    | 2.97 | 1.57  | 2.56E-02 | 1.59 |
| Serum |              | 2-aminobutyric acid       | 2.24 | 1.16  | 4.68E-02 | 1.33 |
| Serum |              | lauric acid               | 2.07 | 1.05  | 1.50E-02 | 1.83 |
| Serum |              | sorbitol                  | 1.74 | 0.80  | 4.96E-02 | 1.30 |
| Serum |              | glycolic acid             | 1.68 | 0.75  | 5.76E-03 | 2.24 |
| Serum |              | 2-hydroxyglutaric acid    | 1.66 | 0.73  | 9.35E-03 | 2.03 |
| Serum |              | 2-ketobutyric acid        | 1.63 | 0.70  | 5.11E-03 | 2.29 |
| Serum |              | conduritol-beta-expoxide  | 1.60 | 0.68  | 4.48E-03 | 2.35 |
| Serum |              | pantothenic acid          | 1.59 | 0.67  | 4.60E-03 | 2.34 |
| Serum |              | 2-hydroxyhexanoic acid    | 1.57 | 0.66  | 1.54E-02 | 1.81 |
| Serum | LCCRF vs. SD | tocopherol alpha-         | 1.57 | 0.65  | 4.36E-02 | 1.36 |
| Serum |              | xylose                    | 1.54 | 0.62  | 3.42E-02 | 1.47 |
| Serum |              | fucose                    | 1.51 | 0.60  | 4.31E-02 | 1.37 |
| Serum |              | cholesterol               | 1.49 | 0.57  | 1.41E-02 | 1.85 |
| Serum |              | uric acid                 | 1.37 | 0.46  | 3.22E-02 | 1.49 |
| Serum |              | methionine sulfoxide      | 1.33 | 0.41  | 4.30E-02 | 1.37 |
| Serum |              | saccharic acid            | 1.30 | 0.37  | 2.61E-02 | 1.58 |
| Serum |              | oxalic acid               | 1.25 | 0.32  | 1.65E-02 | 1.78 |
| Serum |              | valine                    | 0.74 | -0.43 | 3.89E-02 | 1.41 |
| Serum |              | alanine                   | 0.72 | -0.46 | 2.68E-02 | 1.57 |
| Serum |              | methionine                | 0.49 | -1.04 | 3.69E-02 | 1.43 |
| Serum |              | conduritol-beta-expoxide  | 7.27 | 2.86  | 2.58E-06 | 5.59 |
| Serum |              | 6-deoxyglucose            | 3.47 | 1.79  | 2.60E-02 | 1.58 |
| Serum |              | hexitol                   | 3.13 | 1.65  | 1.86E-02 | 1.73 |
| Serum | FMDRF vs. SD | glucose-6-phosphate       | 2.25 | 1.17  | 1.91E-02 | 1.72 |
| Serum |              | 9-myristoleate            | 1.78 | 0.83  | 1.55E-02 | 1.81 |
| Serum |              | uric acid                 | 1.34 | 0.42  | 3.96E-02 | 1.40 |
| Serum |              | glyceric acid             | 1.31 | 0.39  | 3.19E-02 | 1.50 |
| Liver |              | 3-hydroxybutyric acid     | 4.86 | 2.28  | 1.82E-06 | 5.74 |
| Liver |              | inosine 5'-monophosphate  | 3.42 | 1.78  | 1.68E-04 | 3.77 |
| Liver |              | oleic acid                | 3.31 | 1.73  | 3.52E-02 | 1.45 |
| Liver |              | squalene                  | 2.82 | 1.50  | 4.20E-04 | 3.38 |
| Liver |              | 2-aminobutyric acid       | 2.51 | 1.33  | 3.06E-03 | 2.51 |
| Liver |              | maleimide                 | 2.11 | 1.07  | 1.86E-02 | 1.73 |
| Liver |              | uric acid                 | 1.99 | 0.99  | 1.62E-02 | 1.79 |
| Liver |              | inosine                   | 1.93 | 0.95  | 5.07E-03 | 2.30 |
| Liver |              | hypoxanthine              | 1.80 | 0.85  | 1.46E-03 | 2.84 |
| Liver |              | 1-monostearin             | 1.66 | 0.73  | 7.58E-03 | 2.12 |
| Liver |              | linolenic acid            | 1.64 | 0.72  | 2.57E-02 | 1.59 |

|       |            |                                 |       |       |          |      |
|-------|------------|---------------------------------|-------|-------|----------|------|
| Liver |            | guanosine                       | 1.61  | 0.68  | 3.60E-05 | 4.44 |
| Liver |            | UDP-glucuronic acid             | 1.57  | 0.65  | 5.64E-03 | 2.25 |
| Liver |            | xanthine                        | 1.56  | 0.64  | 4.93E-03 | 2.31 |
| Liver |            | cholesterol                     | 1.51  | 0.59  | 4.80E-04 | 3.32 |
| Liver |            | 1-monopalmitin                  | 1.50  | 0.58  | 4.55E-02 | 1.34 |
| Liver |            | cytidine-5-monophosphate        | 1.46  | 0.54  | 1.49E-03 | 2.83 |
| Liver |            | myo-inositol                    | 1.43  | 0.52  | 2.65E-03 | 2.58 |
| Liver |            | phosphoethanolamine             | 1.42  | 0.50  | 3.38E-02 | 1.47 |
| Liver |            | xanthosine                      | 1.36  | 0.44  | 4.23E-02 | 1.37 |
| Liver |            | xylose                          | 1.24  | 0.31  | 3.92E-02 | 1.41 |
| Liver |            | oxoproline                      | 0.84  | -0.25 | 1.44E-02 | 1.84 |
| Liver | LCC vs SD  | isoleucine                      | 0.80  | -0.31 | 2.86E-02 | 1.54 |
| Liver |            | dehydroascorbic acid            | 0.78  | -0.35 | 1.63E-02 | 1.79 |
| Liver |            | glycine                         | 0.76  | -0.39 | 2.80E-02 | 1.55 |
| Liver |            | aminomalonic acid               | 0.75  | -0.42 | 4.93E-02 | 1.31 |
| Liver |            | isothreonine                    | 0.75  | -0.42 | 8.01E-03 | 2.10 |
| Liver |            | 2,5-dihydroxypyrazine NIST      | 0.74  | -0.43 | 1.77E-02 | 1.75 |
| Liver |            | pipecolic acid                  | 0.68  | -0.56 | 1.05E-02 | 1.98 |
| Liver |            | fumaric acid                    | 0.67  | -0.57 | 2.87E-02 | 1.54 |
| Liver |            | glucose-1-phosphate             | 0.67  | -0.57 | 5.42E-03 | 2.27 |
| Liver |            | UDP-N-acetylglucosamine         | 0.66  | -0.61 | 1.07E-02 | 1.97 |
| Liver |            | citrulline                      | 0.64  | -0.65 | 3.34E-02 | 1.48 |
| Liver |            | glutaric acid                   | 0.61  | -0.71 | 6.27E-04 | 3.20 |
| Liver |            | urea                            | 0.60  | -0.75 | 5.62E-04 | 3.25 |
| Liver |            | N-acetylglutamate               | 0.55  | -0.85 | 1.72E-02 | 1.76 |
| Liver |            | malic acid                      | 0.55  | -0.86 | 1.18E-02 | 1.93 |
| Liver |            | galactose-6-phosphate           | 0.54  | -0.89 | 2.59E-03 | 2.59 |
| Liver |            | taurine                         | 0.54  | -0.90 | 1.24E-02 | 1.91 |
| Liver |            | 9-myristoleate                  | 0.52  | -0.95 | 4.05E-02 | 1.39 |
| Liver |            | 2-hydroxyglutaric acid          | 0.48  | -1.05 | 4.29E-07 | 6.37 |
| Liver |            | arabitol                        | 0.44  | -1.20 | 1.52E-05 | 4.82 |
| Liver |            | uridine                         | 0.41  | -1.30 | 1.30E-02 | 1.89 |
| Liver |            | glutathione                     | 0.35  | -1.51 | 3.24E-04 | 3.49 |
| Liver |            | tartaric acid                   | 0.32  | -1.63 | 1.63E-03 | 2.79 |
| Liver |            | alpha-aminoadipic acid          | 0.31  | -1.70 | 1.02E-03 | 2.99 |
| Liver |            | conduritol-beta-expoixide       | 12.54 | 3.65  | 7.11E-05 | 4.15 |
| Liver |            | 3-hydroxybutyric acid           | 4.78  | 2.26  | 2.81E-07 | 6.55 |
| Liver |            | squalene                        | 3.03  | 1.60  | 2.71E-03 | 2.57 |
| Liver |            | inosine 5'-monophosphate        | 2.72  | 1.44  | 2.53E-03 | 2.60 |
| Liver |            | myo-inositol                    | 2.60  | 1.38  | 5.00E-06 | 5.30 |
| Liver |            | ribose                          | 2.52  | 1.33  | 4.19E-02 | 1.38 |
| Liver |            | ethanolamine                    | 2.37  | 1.25  | 8.04E-04 | 3.09 |
| Liver |            | UDP-glucuronic acid             | 2.34  | 1.22  | 2.11E-03 | 2.67 |
| Liver |            | inosine                         | 2.25  | 1.17  | 2.48E-02 | 1.61 |
| Liver |            | guanosine                       | 2.17  | 1.12  | 1.40E-05 | 4.85 |
| Liver |            | hypoxanthine                    | 2.16  | 1.11  | 1.21E-02 | 1.92 |
| Liver |            | arabinose                       | 2.13  | 1.09  | 3.24E-02 | 1.49 |
| Liver |            | isohexonic acid                 | 2.05  | 1.03  | 8.38E-03 | 2.08 |
| Liver |            | adenosine-5-monophosphate       | 2.01  | 1.01  | 2.18E-02 | 1.66 |
| Liver |            | beta-alanine                    | 1.94  | 0.96  | 2.07E-02 | 1.68 |
| Liver |            | glycyl proline                  | 1.78  | 0.83  | 2.78E-02 | 1.56 |
| Liver |            | threonic acid                   | 1.78  | 0.83  | 1.87E-02 | 1.73 |
| Liver |            | adenosine                       | 1.77  | 0.82  | 1.84E-02 | 1.74 |
| Liver |            | xanthine                        | 1.73  | 0.79  | 2.77E-02 | 1.56 |
| Liver |            | allantoic acid                  | 1.73  | 0.79  | 8.66E-03 | 2.06 |
| Liver |            | inositol-4-monophosphate        | 1.73  | 0.79  | 3.20E-02 | 1.49 |
| Liver |            | phosphoethanolamine             | 1.67  | 0.74  | 1.19E-02 | 1.92 |
| Liver |            | phosphoenolpyruvate             | 1.66  | 0.73  | 1.61E-02 | 1.79 |
| Liver |            | galacturonic acid               | 1.62  | 0.70  | 3.42E-03 | 2.47 |
| Liver |            | N-acetylglycine NIST            | 1.62  | 0.70  | 4.01E-03 | 2.40 |
| Liver |            | creatinine                      | 1.59  | 0.67  | 7.15E-03 | 2.15 |
| Liver | FMD vs. SD | itaconic acid                   | 1.58  | 0.66  | 1.57E-02 | 1.80 |
| Liver |            | glutamine                       | 1.57  | 0.65  | 2.08E-02 | 1.68 |
| Liver |            | gluconic acid                   | 1.49  | 0.58  | 3.20E-02 | 1.49 |
| Liver |            | serine                          | 1.49  | 0.58  | 2.60E-04 | 3.59 |
| Liver |            | 5'-deoxy-5'-methylthioadenosine | 1.47  | 0.56  | 3.94E-02 | 1.40 |
| Liver |            | hexuronic acid                  | 1.38  | 0.46  | 3.44E-02 | 1.46 |
| Liver |            | phenylalanine                   | 1.27  | 0.35  | 2.43E-02 | 1.61 |
| Liver |            | cholesterol                     | 1.26  | 0.33  | 1.16E-02 | 1.94 |
| Liver |            | maleimide                       | 1.24  | 0.31  | 1.39E-02 | 1.86 |
| Liver |            | trans-4-hydroxy-L-proline       | 0.79  | -0.34 | 7.04E-03 | 2.15 |
| Liver |            | glycine                         | 0.78  | -0.36 | 2.87E-02 | 1.54 |
| Liver |            | dehydroascorbic acid            | 0.77  | -0.37 | 1.03E-02 | 1.99 |
| Liver |            | oxoproline                      | 0.75  | -0.42 | 4.77E-03 | 2.32 |
| Liver |            | dihydrocholesterol              | 0.74  | -0.43 | 2.20E-02 | 1.66 |

|       |                     |                                 |                          |       |          |          |      |
|-------|---------------------|---------------------------------|--------------------------|-------|----------|----------|------|
| Liver |                     | arachidonic acid                | 0.70                     | -0.52 | 4.93E-02 | 1.31     |      |
| Liver |                     | urea                            | 0.59                     | -0.76 | 6.71E-04 | 3.17     |      |
| Liver |                     | 2-hydroxyglutaric acid          | 0.59                     | -0.77 | 4.31E-05 | 4.37     |      |
| Liver |                     | isothreonine acid               | 0.56                     | -0.83 | 3.92E-04 | 3.41     |      |
| Liver |                     | galactose-6-phosphate           | 0.55                     | -0.87 | 4.80E-03 | 2.32     |      |
| Liver |                     | glutaric acid                   | 0.55                     | -0.87 | 6.22E-04 | 3.21     |      |
| Liver |                     | arabitol                        | 0.52                     | -0.95 | 1.65E-04 | 3.78     |      |
| Liver |                     | ascorbic acid                   | 0.49                     | -1.01 | 2.18E-02 | 1.66     |      |
| Liver |                     | glucose-1-phosphate             | 0.44                     | -1.20 | 4.58E-03 | 2.34     |      |
| Liver |                     | tartaric acid                   | 0.31                     | -1.70 | 1.81E-03 | 2.74     |      |
| Liver |                     | alpha-aminoadipic acid          | 0.28                     | -1.86 | 8.79E-04 | 3.06     |      |
| Liver |                     | hydroxycarbamate NIST           | 0.26                     | -1.97 | 4.03E-02 | 1.39     |      |
| Liver |                     | glutathione                     | 0.23                     | -2.13 | 9.61E-05 | 4.02     |      |
| Liver |                     | taurine                         | 0.09                     | -3.40 | 1.79E-05 | 4.75     |      |
| Liver | LCCRF vs. SD        | citric acid                     | 3.87                     | 1.95  | 3.43E-02 | 1.46     |      |
| Liver |                     | 2-aminobutyric acid             | 2.84                     | 1.51  | 1.63E-02 | 1.79     |      |
| Liver |                     | 3-hydroxybutyric acid           | 2.25                     | 1.17  | 3.39E-02 | 1.47     |      |
| Liver |                     | gluconic acid                   | 2.10                     | 1.07  | 2.41E-02 | 1.62     |      |
| Liver |                     | galactonic acid                 | 1.99                     | 0.99  | 3.58E-02 | 1.45     |      |
| Liver |                     | guanosine                       | 1.66                     | 0.73  | 4.09E-02 | 1.39     |      |
| Liver |                     | allantoic acid                  | 1.53                     | 0.62  | 4.53E-02 | 1.34     |      |
| Liver |                     | 1-monostearin                   | 1.53                     | 0.61  | 1.60E-02 | 1.80     |      |
| Liver |                     | serine                          | 1.29                     | 0.36  | 1.32E-02 | 1.88     |      |
| Liver |                     | cholesterol                     | 1.28                     | 0.36  | 4.06E-02 | 1.39     |      |
| Liver |                     | xylose                          | 1.25                     | 0.32  | 2.60E-02 | 1.58     |      |
| Liver |                     | behenic acid                    | 0.77                     | -0.37 | 3.64E-02 | 1.44     |      |
| Liver |                     | 2,5-dihydroxypyrazine NIST      | 0.72                     | -0.48 | 4.31E-02 | 1.37     |      |
| Liver |                     | pipecolinic acid                | 0.72                     | -0.48 | 3.52E-02 | 1.45     |      |
| Liver |                     | glucose-1-phosphate             | 0.66                     | -0.59 | 3.78E-02 | 1.42     |      |
| Liver |                     | galacturonic acid               | 0.64                     | -0.63 | 2.28E-02 | 1.64     |      |
| Liver |                     | glutaric acid                   | 0.63                     | -0.68 | 2.10E-02 | 1.68     |      |
| Liver |                     | arabitol                        | 0.57                     | -0.82 | 3.60E-03 | 2.44     |      |
| Liver |                     | glutathione                     | 0.50                     | -1.01 | 1.98E-02 | 1.70     |      |
| Liver |                     | glycerol-alpha-phosphate        | 0.42                     | -1.25 | 3.95E-02 | 1.40     |      |
| Liver |                     | alpha-aminoadipic acid          | 0.41                     | -1.29 | 2.72E-02 | 1.57     |      |
| Liver |                     | galactose-6-phosphate           | 0.36                     | -1.48 | 1.96E-03 | 2.71     |      |
| Liver |                     | FMDRF vs. SD                    | conduritol-beta-expoxide | 4.22  | 2.08     | 1.79E-04 | 3.75 |
| Liver | citric acid         |                                 | 2.95                     | 1.56  | 1.22E-02 | 1.91     |      |
| Liver | uracil              |                                 | 2.09                     | 1.06  | 4.76E-02 | 1.32     |      |
| Liver | glycyl proline      |                                 | 1.79                     | 0.84  | 1.58E-02 | 1.80     |      |
| Liver | asparagine          |                                 | 0.80                     | -0.33 | 2.48E-02 | 1.61     |      |
| Liver | N-acetylmannosamine |                                 | 0.60                     | -0.73 | 3.03E-02 | 1.52     |      |
| Liver | raffinose           |                                 | 0.43                     | -1.22 | 4.79E-02 | 1.32     |      |
| Liver | p-tolyl glucuronide |                                 | 0.41                     | -1.28 | 7.04E-03 | 2.15     |      |
| Serum | HFD+LCC vs HFD      | 3-hydroxybutyric acid           | 5.59                     | 2.48  | 6.97E-04 | 3.16     |      |
| Serum |                     | 2-aminobutyric acid             | 4.84                     | 2.28  | 4.08E-06 | 5.39     |      |
| Serum |                     | 2-hydroxybutanoic acid          | 3.87                     | 1.95  | 4.16E-06 | 5.38     |      |
| Serum |                     | cysteine                        | 3.36                     | 1.75  | 2.21E-02 | 1.66     |      |
| Serum |                     | 2,3-dihydroxybutanoic acid NIST | 3.11                     | 1.64  | 2.57E-04 | 3.59     |      |
| Serum |                     | itaconic acid                   | 2.77                     | 1.47  | 2.27E-05 | 4.64     |      |
| Serum |                     | N-acetyl-D-tryptophan           | 2.53                     | 1.34  | 3.05E-04 | 3.52     |      |
| Serum |                     | N-acetylglycine NIST            | 2.23                     | 1.16  | 3.27E-02 | 1.49     |      |
| Serum |                     | indole-3-lactate                | 2.22                     | 1.15  | 1.93E-03 | 2.71     |      |
| Serum |                     | pantothenic acid                | 2.06                     | 1.04  | 4.16E-02 | 1.38     |      |
| Serum |                     | citrulline                      | 2.02                     | 1.02  | 4.82E-02 | 1.32     |      |
| Serum |                     | tryptophan                      | 1.73                     | 0.79  | 3.06E-04 | 3.51     |      |
| Serum |                     | palmitoleic acid                | 1.63                     | 0.71  | 2.95E-03 | 2.53     |      |
| Serum |                     | oleic acid                      | 1.57                     | 0.65  | 1.39E-02 | 1.86     |      |
| Serum |                     | phosphoenolpyruvate             | 1.53                     | 0.62  | 4.50E-02 | 1.35     |      |
| Serum |                     | linolenic acid                  | 1.49                     | 0.57  | 6.23E-03 | 2.21     |      |
| Serum |                     | linoleic acid                   | 1.46                     | 0.54  | 9.05E-03 | 2.04     |      |
| Serum |                     | arachidonic acid                | 1.44                     | 0.52  | 1.40E-02 | 1.85     |      |
| Serum |                     | 9-myristoleate                  | 1.38                     | 0.46  | 1.20E-02 | 1.92     |      |
| Serum |                     | glycerol                        | 1.26                     | 0.34  | 4.64E-02 | 1.33     |      |
| Serum |                     | benzoic acid                    | 0.82                     | -0.28 | 2.30E-02 | 1.64     |      |
| Serum |                     | 1-monoolein                     | 0.71                     | -0.49 | 4.93E-02 | 1.31     |      |
| Serum |                     | isoleucine                      | 0.64                     | -0.65 | 2.94E-03 | 2.53     |      |
| Serum |                     | levoglucosan                    | 0.63                     | -0.67 | 1.92E-02 | 1.72     |      |
| Serum |                     | capric acid                     | 0.57                     | -0.82 | 7.52E-03 | 2.12     |      |
| Serum |                     | adipic acid                     | 0.55                     | -0.85 | 3.14E-02 | 1.50     |      |
| Serum |                     | methionine sulfoxide            | 0.51                     | -0.97 | 3.00E-02 | 1.52     |      |
| Serum |                     | 4-hydroxyphenylacetic acid      | 0.49                     | -1.04 | 2.18E-02 | 1.66     |      |
| Serum |                     | xylonolactone NIST              | 0.36                     | -1.48 | 3.33E-02 | 1.48     |      |
| Serum |                     | tartaric acid                   | 0.04                     | -4.48 | 3.30E-02 | 1.48     |      |
| Serum |                     |                                 | conduritol-beta-expoxide | 10.20 | 3.35     | 1.08E-05 | 4.97 |

|       |  |                            |      |       |          |      |
|-------|--|----------------------------|------|-------|----------|------|
| Serum |  | hexitol                    | 7.79 | 2.96  | 2.96E-03 | 2.53 |
| Serum |  | 2-aminobutyric acid        | 4.83 | 2.27  | 2.42E-04 | 3.62 |
| Serum |  | aspartic acid              | 3.30 | 1.72  | 3.25E-02 | 1.49 |
| Serum |  | 3-hydroxybutyric acid      | 3.06 | 1.61  | 4.62E-03 | 2.34 |
| Serum |  | allantoic acid             | 2.76 | 1.46  | 1.08E-02 | 1.97 |
| Serum |  | 2-ketoisocaproic acid      | 2.63 | 1.39  | 1.41E-02 | 1.85 |
| Serum |  | arabitol                   | 2.54 | 1.35  | 5.28E-04 | 3.28 |
| Serum |  | cysteine                   | 2.53 | 1.34  | 1.06E-02 | 1.97 |
| Serum |  | citrulline                 | 2.49 | 1.32  | 7.12E-03 | 2.15 |
| Serum |  | 2-hydroxybutanoic acid     | 2.06 | 1.04  | 1.74E-02 | 1.76 |
| Serum |  | cystine                    | 1.92 | 0.94  | 1.09E-04 | 3.96 |
| Serum |  | creatinine                 | 1.85 | 0.89  | 2.56E-02 | 1.59 |
| Serum |  | phosphoenolpyruvate        | 1.77 | 0.82  | 4.27E-02 | 1.37 |
| Serum |  | oleic acid                 | 1.74 | 0.80  | 3.25E-02 | 1.49 |
| Serum |  | myo-inositol               | 1.62 | 0.70  | 2.17E-02 | 1.66 |
| Serum |  | linoleic acid              | 1.60 | 0.68  | 4.26E-02 | 1.37 |
| Serum |  | tryptophan                 | 1.57 | 0.65  | 7.58E-03 | 2.12 |
| Serum |  | itaconic acid              | 1.56 | 0.65  | 6.50E-03 | 2.19 |
| Serum |  | homoserine                 | 1.52 | 0.61  | 7.01E-03 | 2.15 |
| Serum |  | N-acetyl-D-tryptophan      | 1.52 | 0.60  | 3.32E-02 | 1.48 |
| Serum |  | 2-deoxytetroneic acid      | 1.35 | 0.43  | 9.31E-03 | 2.03 |
| Serum |  | fucose                     | 1.33 | 0.42  | 3.98E-02 | 1.40 |
| Serum |  | threonic acid              | 1.33 | 0.41  | 2.56E-02 | 1.59 |
| Serum |  | glycine                    | 1.31 | 0.39  | 4.48E-02 | 1.35 |
| Serum |  | serine                     | 1.21 | 0.27  | 2.84E-02 | 1.55 |
| Serum |  | lactic acid                | 0.77 | -0.37 | 1.52E-02 | 1.82 |
| Serum |  | uridine                    | 0.73 | -0.46 | 1.93E-02 | 1.72 |
| Serum |  | 2-hydroxyglutaric acid     | 0.72 | -0.47 | 2.93E-02 | 1.53 |
| Serum |  | isoleucine                 | 0.71 | -0.49 | 2.50E-02 | 1.60 |
| Serum |  | myristic acid              | 0.71 | -0.49 | 3.77E-02 | 1.42 |
| Serum |  | lauric acid                | 0.68 | -0.56 | 3.79E-02 | 1.42 |
| Serum |  | N-acetylmannosamine        | 0.66 | -0.59 | 8.04E-03 | 2.09 |
| Serum |  | succinic acid              | 0.57 | -0.80 | 1.29E-02 | 1.89 |
| Serum |  | 2-monoolein                | 0.57 | -0.82 | 4.56E-02 | 1.34 |
| Serum |  | 1-monoolein                | 0.53 | -0.91 | 5.61E-03 | 2.25 |
| Serum |  | 4-hydroxyphenylacetic acid | 0.49 | -1.03 | 2.46E-02 | 1.61 |
| Serum |  | capric acid                | 0.42 | -1.25 | 2.34E-03 | 2.63 |
| Serum |  | indole-3-acetate           | 0.42 | -1.25 | 2.11E-02 | 1.68 |
| Serum |  | adipic acid                | 0.42 | -1.27 | 1.46E-02 | 1.84 |
| Serum |  | fructose                   | 0.36 | -1.46 | 2.90E-02 | 1.54 |
| Serum |  | methionine sulfoxide       | 0.36 | -1.49 | 1.35E-02 | 1.87 |
| Serum |  | uric acid                  | 1.72 | 0.78  | 4.62E-02 | 1.34 |
| Serum |  | glycine                    | 1.26 | 0.34  | 1.97E-02 | 1.71 |
| Serum |  | hexitol                    | 3.67 | 1.88  | 1.99E-04 | 3.70 |
| Serum |  | conduritol-beta-epoxide    | 3.48 | 1.80  | 5.43E-04 | 3.26 |
| Serum |  | citric acid                | 1.96 | 0.97  | 3.79E-03 | 2.42 |
| Serum |  | cysteine                   | 1.71 | 0.77  | 4.65E-02 | 1.33 |
| Serum |  | alanine                    | 1.58 | 0.66  | 3.46E-02 | 1.46 |
| Serum |  | isocitric acid             | 1.53 | 0.62  | 1.02E-02 | 1.99 |
| Serum |  | 2-ketobutyric acid         | 0.75 | -0.42 | 2.10E-02 | 1.68 |
| Serum |  | oxalic acid                | 0.74 | -0.43 | 4.95E-02 | 1.31 |
| Serum |  | N-acetylmannosamine        | 0.67 | -0.59 | 9.60E-03 | 2.02 |
| Serum |  | glycolic acid              | 0.62 | -0.68 | 5.74E-03 | 2.24 |
| Serum |  | cellobiose                 | 0.59 | -0.77 | 4.76E-02 | 1.32 |
| Serum |  | urocanic acid              | 0.53 | -0.92 | 3.47E-02 | 1.46 |
| Serum |  | histidine                  | 0.45 | -1.16 | 3.96E-02 | 1.40 |
| Liver |  | 3-hydroxybutyric acid      | 3.69 | 1.88  | 2.41E-04 | 3.62 |
| Liver |  | 2-aminobutyric acid        | 2.83 | 1.50  | 2.89E-05 | 4.54 |
| Liver |  | inosine 5'-monophosphate   | 2.41 | 1.27  | 2.47E-03 | 2.61 |
| Liver |  | pyruvic acid               | 2.08 | 1.06  | 2.05E-02 | 1.69 |
| Liver |  | adenosine                  | 1.82 | 0.87  | 1.65E-03 | 2.78 |
| Liver |  | n-acetyl-d-hexosamine      | 1.77 | 0.82  | 3.57E-02 | 1.45 |
| Liver |  | UDP-glucuronic acid        | 1.77 | 0.82  | 1.87E-04 | 3.73 |
| Liver |  | inositol-4-monophosphate   | 1.72 | 0.78  | 3.08E-02 | 1.51 |
| Liver |  | adipic acid                | 1.60 | 0.68  | 8.21E-03 | 2.09 |
| Liver |  | pantothenic acid           | 1.59 | 0.67  | 4.95E-03 | 2.31 |
| Liver |  | phosphoethanolamine        | 1.58 | 0.66  | 6.89E-03 | 2.16 |
| Liver |  | 2-hydroxybutanoic acid     | 1.55 | 0.63  | 7.85E-03 | 2.11 |
| Liver |  | hydroquinone               | 1.34 | 0.42  | 1.92E-02 | 1.72 |
| Liver |  | indole-3-lactate           | 1.33 | 0.41  | 1.96E-02 | 1.71 |
| Liver |  | saccharic acid             | 1.30 | 0.38  | 7.37E-03 | 2.13 |
| Liver |  | 5-methoxytryptamine        | 1.28 | 0.36  | 4.51E-02 | 1.35 |
| Liver |  | cholesterol                | 1.26 | 0.33  | 6.18E-03 | 2.21 |
| Liver |  | palmitic acid              | 1.21 | 0.27  | 1.01E-03 | 3.00 |
| Liver |  | tyrosine                   | 0.78 | -0.36 | 2.08E-02 | 1.68 |

|       |                   |                          |       |       |          |      |
|-------|-------------------|--------------------------|-------|-------|----------|------|
| Liver |                   | fructose                 | 0.68  | -0.55 | 4.22E-02 | 1.37 |
| Liver |                   | histidine                | 0.64  | -0.64 | 2.36E-02 | 1.63 |
| Liver |                   | ornithine 3TMS           | 0.64  | -0.65 | 3.24E-02 | 1.49 |
| Liver |                   | urea                     | 0.60  | -0.73 | 3.21E-04 | 3.49 |
| Liver |                   | fumaric acid             | 0.60  | -0.74 | 3.67E-02 | 1.44 |
| Liver |                   | glutamic acid            | 0.57  | -0.81 | 1.17E-03 | 2.93 |
| Liver |                   | xylitol                  | 0.51  | -0.97 | 7.41E-03 | 2.13 |
| Liver |                   | alpha-aminoadipic acid   | 0.51  | -0.98 | 1.51E-02 | 1.82 |
| Liver |                   | malic acid               | 0.44  | -1.18 | 4.43E-03 | 2.35 |
| Liver |                   | tartaric acid            | 0.36  | -1.47 | 6.19E-03 | 2.21 |
| Liver |                   | conduritol-beta-exposide | 11.32 | 3.50  | 3.13E-05 | 4.50 |
| Liver |                   | hexitol                  | 8.04  | 3.01  | 6.75E-06 | 5.17 |
| Liver |                   | 2-aminobutyric acid      | 3.15  | 1.66  | 3.92E-04 | 3.41 |
| Liver |                   | cholesterone             | 2.85  | 1.51  | 2.38E-02 | 1.62 |
| Liver |                   | 3-hydroxybutyric acid    | 2.85  | 1.51  | 2.81E-04 | 3.55 |
| Liver |                   | inosine                  | 2.57  | 1.36  | 1.90E-03 | 2.72 |
| Liver |                   | creatinine               | 2.48  | 1.31  | 2.20E-02 | 1.66 |
| Liver |                   | adenosine                | 2.40  | 1.26  | 4.99E-02 | 1.30 |
| Liver |                   | phosphoethanolamine      | 2.38  | 1.25  | 2.70E-03 | 2.57 |
| Liver |                   | beta-alanine             | 2.22  | 1.15  | 8.67E-03 | 2.06 |
| Liver |                   | myo-inositol             | 1.93  | 0.95  | 1.42E-03 | 2.85 |
| Liver |                   | inosine 5'-monophosphate | 1.77  | 0.83  | 4.04E-02 | 1.39 |
| Liver |                   | hypoxanthine             | 1.73  | 0.79  | 3.69E-03 | 2.43 |
| Liver |                   | ethanolamine             | 1.72  | 0.78  | 3.63E-02 | 1.44 |
| Liver |                   | 5-methoxytryptamine      | 1.70  | 0.77  | 3.24E-02 | 1.49 |
| Liver |                   | threonic acid            | 1.67  | 0.74  | 8.34E-03 | 2.08 |
| Liver |                   | uridine                  | 1.61  | 0.69  | 1.37E-02 | 1.86 |
| Liver |                   | UDP-glucuronic acid      | 1.59  | 0.66  | 2.71E-02 | 1.57 |
| Liver |                   | cellobiose               | 1.56  | 0.64  | 2.91E-02 | 1.54 |
| Liver |                   | maltose 1                | 1.55  | 0.63  | 2.82E-02 | 1.55 |
| Liver |                   | phosphoenolpyruvate      | 1.54  | 0.63  | 4.91E-03 | 2.31 |
| Liver |                   | galacturonic acid        | 1.54  | 0.62  | 2.99E-02 | 1.52 |
| Liver |                   | serine                   | 1.52  | 0.60  | 2.68E-02 | 1.57 |
| Liver |                   | 1-monooloin              | 1.51  | 0.60  | 2.45E-02 | 1.61 |
| Liver | HFD+FMD vs HFD    | arabinose                | 1.48  | 0.57  | 1.77E-02 | 1.75 |
| Liver |                   | ribitol                  | 1.47  | 0.56  | 2.46E-02 | 1.61 |
| Liver |                   | 2-ketobutyric acid       | 1.46  | 0.55  | 4.63E-02 | 1.33 |
| Liver |                   | saccharic acid           | 1.42  | 0.50  | 1.02E-02 | 1.99 |
| Liver |                   | heptadecanoic acid       | 1.33  | 0.41  | 3.12E-02 | 1.51 |
| Liver |                   | 3,6-anhydro-D-galactose  | 1.32  | 0.40  | 2.69E-02 | 1.57 |
| Liver |                   | 2-deoxytetrionic acid    | 1.28  | 0.36  | 1.44E-02 | 1.84 |
| Liver |                   | indole-3-lactate         | 1.28  | 0.35  | 2.32E-02 | 1.64 |
| Liver |                   | cholesterol              | 1.24  | 0.31  | 4.90E-03 | 2.31 |
| Liver |                   | myristic acid            | 0.80  | -0.32 | 2.93E-02 | 1.53 |
| Liver |                   | levoglucosan             | 0.79  | -0.33 | 3.23E-02 | 1.49 |
| Liver |                   | tyrosine                 | 0.78  | -0.36 | 1.81E-02 | 1.74 |
| Liver |                   | oleamide NIST            | 0.71  | -0.50 | 4.16E-02 | 1.38 |
| Liver |                   | lactic acid              | 0.70  | -0.51 | 2.11E-02 | 1.68 |
| Liver |                   | arachidic acid           | 0.70  | -0.52 | 4.93E-02 | 1.31 |
| Liver |                   | lauric acid              | 0.64  | -0.64 | 1.76E-02 | 1.75 |
| Liver |                   | proline                  | 0.63  | -0.67 | 2.18E-02 | 1.66 |
| Liver |                   | histidine                | 0.61  | -0.71 | 1.95E-02 | 1.71 |
| Liver |                   | urea                     | 0.55  | -0.86 | 2.29E-04 | 3.64 |
| Liver |                   | palmitoleic acid         | 0.55  | -0.87 | 3.10E-02 | 1.51 |
| Liver |                   | N-acetylglutamate        | 0.53  | -0.92 | 3.86E-02 | 1.41 |
| Liver |                   | alpha-aminoadipic acid   | 0.51  | -0.97 | 2.08E-02 | 1.68 |
| Liver |                   | cysteine                 | 0.49  | -1.03 | 4.06E-02 | 1.39 |
| Liver |                   | glutathione              | 0.45  | -1.14 | 1.60E-02 | 1.79 |
| Liver |                   | tartaric acid            | 0.30  | -1.72 | 3.28E-03 | 2.48 |
| Liver |                   | adenosine                | 1.80  | 0.85  | 7.32E-03 | 2.14 |
| Liver | HFD+LCC-RF vs HFD | octadecanol              | 1.70  | 0.76  | 2.48E-02 | 1.61 |
| Liver |                   | pantothenic acid         | 1.41  | 0.50  | 7.95E-03 | 2.10 |
| Liver |                   | fumaric acid             | 0.42  | -1.24 | 2.36E-02 | 1.63 |
| Liver |                   | malic acid               | 0.34  | -1.57 | 8.31E-03 | 2.08 |
| Liver |                   | conduritol-beta-exposide | 3.31  | 1.73  | 8.91E-07 | 6.05 |
| Liver |                   | hexitol                  | 2.55  | 1.35  | 2.38E-07 | 6.62 |
| Liver |                   | pyruvic acid             | 2.03  | 1.02  | 4.24E-02 | 1.37 |
| Liver | HFD+FMD-RF vs HFD | 2-monooloin              | 1.98  | 0.98  | 9.36E-03 | 2.03 |
| Liver |                   | isomaltose               | 1.46  | 0.54  | 2.53E-02 | 1.60 |
| Liver |                   | aspartic acid            | 0.60  | -0.74 | 4.59E-02 | 1.34 |
| Liver |                   | malic acid               | 0.49  | -1.02 | 3.42E-02 | 1.47 |

Supplementary Table 2. Metabolites implicated in the ‘Central Core of Fasting’ in the serum and liver of mice fed SD and HFD.

|                        |                                 | Shared Metabolites under 3 days of low-calorie intake |             |           |             |      |
|------------------------|---------------------------------|-------------------------------------------------------|-------------|-----------|-------------|------|
|                        |                                 | LCC vs SD                                             |             | FMD vs SD |             |      |
| Biological Sample      | Metabolite                      | raw.pval                                              | Fold Change | raw.pval  | Fold Change |      |
| Serum                  | conduritol-beta-epoxide         | 4.59E-04                                              | 2.79        | 4.0E-09   | 27.41       |      |
|                        | 3-hydroxybutyric acid           | 1.59E-04                                              | 14.04       | 1.1E-06   | 14.34       |      |
|                        | lauric acid                     | 1.18E-02                                              | 2.65        | 1.3E-07   | 4.18        |      |
|                        | myo-inositol                    | 2.65E-03                                              | 2.07        | 3.5E-06   | 3.44        |      |
|                        | 2,3-dihydroxybutanoic acid NIST | 7.74E-06                                              | 3.55        | 3.4E-04   | 2.69        |      |
|                        | linolenic acid                  | 1.03E-03                                              | 4.57        | 4.5E-02   | 2.33        |      |
|                        | mannose                         | 1.99E-02                                              | 1.81        | 3.4E-04   | 2.32        |      |
|                        | itaconic acid                   | 3.20E-06                                              | 2.60        | 6.6E-04   | 2.16        |      |
|                        | 2-aminobutyric acid             | 2.44E-03                                              | 2.40        | 5.9E-04   | 2.15        |      |
|                        | 2-hydroxybutanoic acid          | 1.58E-05                                              | 3.26        | 1.0E-02   | 1.97        |      |
|                        | fucose                          | 5.86E-03                                              | 1.63        | 4.2E-04   | 1.94        |      |
|                        | indoxyl sulfate                 | 3.76E-03                                              | 1.76        | 5.8E-03   | 1.90        |      |
|                        | threonic acid                   | 2.84E-03                                              | 1.49        | 1.4E-05   | 1.82        |      |
|                        | 2-deoxytetronic acid            | 1.40E-02                                              | 1.55        | 2.0E-02   | 1.80        |      |
|                        | glycolic acid                   | 3.15E-03                                              | 1.48        | 4.6E-05   | 1.62        |      |
|                        | oleic acid                      | 1.08E-02                                              | 1.77        | 4.1E-02   | 1.60        |      |
|                        | nicotinamide                    | 3.49E-02                                              | 1.52        | 2.6E-03   | 1.56        |      |
|                        | creatinine                      | 7.96E-03                                              | 1.75        | 1.3E-02   | 1.54        |      |
|                        | xylose                          | 3.30E-02                                              | 1.40        | 9.9E-03   | 1.48        |      |
|                        | thymine                         | 2.73E-02                                              | 1.45        | 3.2E-02   | 1.46        |      |
|                        | oxoproline                      | 2.79E-03                                              | 1.38        | 2.5E-04   | 1.39        |      |
|                        | glyceric acid                   | 1.30E-02                                              | 1.78        | 1.6E-02   | 1.36        |      |
|                        | glycerol                        | 6.00E-03                                              | 1.52        | 1.4E-02   | 1.33        |      |
|                        | oleamide NIST                   | 1.60E-02                                              | 1.47        | 4.1E-02   | 1.31        |      |
|                        | isoleucine                      | 4.50E-04                                              | 0.61        | 2.9E-02   | 0.76        |      |
|                        | alanine                         | 1.30E-03                                              | 0.60        | 8.6E-04   | 0.63        |      |
|                        | valine                          | 8.28E-05                                              | 0.48        | 6.1E-04   | 0.61        |      |
|                        | threonine                       | 8.48E-04                                              | 0.53        | 1.5E-03   | 0.61        |      |
|                        | beta-sitosterol                 | 2.03E-02                                              | 0.51        | 2.0E-02   | 0.53        |      |
|                        | proline                         | 3.97E-03                                              | 0.31        | 4.3E-03   | 0.39        |      |
|                        | tartaric acid                   | 5.58E-03                                              | 0.04        | 2.8E-03   | 0.04        |      |
|                        | Liver                           | 3-hydroxybutyric acid                                 | 1.82E-06    | 4.86      | 2.8E-07     | 4.78 |
|                        |                                 | squalene                                              | 4.20E-04    | 2.82      | 2.7E-03     | 3.03 |
|                        |                                 | inosine 5'-monophosphate                              | 1.68E-04    | 3.42      | 2.5E-03     | 2.72 |
|                        |                                 | myo-inositol                                          | 2.65E-03    | 1.43      | 5.0E-06     | 2.60 |
|                        |                                 | UDP-glucuronic acid                                   | 5.64E-03    | 1.57      | 2.1E-03     | 2.34 |
|                        |                                 | inosine                                               | 5.07E-03    | 1.93      | 2.5E-02     | 2.25 |
|                        |                                 | guanosine                                             | 3.60E-05    | 1.61      | 1.4E-05     | 2.17 |
|                        |                                 | hypoxanthine                                          | 1.46E-03    | 1.80      | 1.2E-02     | 2.16 |
|                        |                                 | xanthine                                              | 4.93E-03    | 1.56      | 2.8E-02     | 1.73 |
| phosphoethanolamine    |                                 | 3.38E-02                                              | 1.42        | 1.2E-02   | 1.67        |      |
| cholesterol            |                                 | 4.80E-04                                              | 1.51        | 1.2E-02   | 1.26        |      |
| maleimide              |                                 | 1.86E-02                                              | 2.11        | 1.4E-02   | 1.24        |      |
| glycine                |                                 | 2.80E-02                                              | 0.76        | 2.9E-02   | 0.78        |      |
| dehydroascorbic acid   |                                 | 1.63E-02                                              | 0.78        | 1.0E-02   | 0.77        |      |
| oxoproline             |                                 | 1.44E-02                                              | 0.84        | 4.8E-03   | 0.75        |      |
| urea                   |                                 | 5.62E-04                                              | 0.60        | 6.7E-04   | 0.59        |      |
| 2-hydroxyglutaric acid |                                 | 4.29E-07                                              | 0.48        | 4.3E-05   | 0.59        |      |
| isothreonic acid       |                                 | 8.01E-03                                              | 0.75        | 3.9E-04   | 0.56        |      |
| galactose-6-phosphate  |                                 | 2.59E-03                                              | 0.54        | 4.8E-03   | 0.55        |      |
| glutaric acid          |                                 | 6.27E-04                                              | 0.61        | 6.2E-04   | 0.55        |      |
| arabitol               |                                 | 1.52E-05                                              | 0.44        | 1.7E-04   | 0.52        |      |
| glucose-1-phosphate    |                                 | 5.42E-03                                              | 0.67        | 4.6E-03   | 0.44        |      |
| tartaric acid          |                                 | 1.63E-03                                              | 0.32        | 1.8E-03   | 0.31        |      |
| alpha-aminoadipic acid |                                 | 1.02E-03                                              | 0.31        | 8.8E-04   | 0.28        |      |
| glutathione            |                                 | 3.24E-04                                              | 0.35        | 9.6E-05   | 0.23        |      |
| taurine                |                                 | 1.24E-02                                              | 0.54        | 1.8E-05   | 0.09        |      |

|                          |                            | Shared Metabolites under 3 days of low-calorie intake |             |                |             |      |
|--------------------------|----------------------------|-------------------------------------------------------|-------------|----------------|-------------|------|
|                          |                            | HFD+LCC vs HFD                                        |             | HFD+FMD vs HFD |             |      |
| Biological Sample        | Metabolite                 | raw.pval                                              | Fold Change | raw.pval       | Fold Change |      |
| Serum                    | 2-aminobutyric acid        | 4.08E-06                                              | 4.84        | 2.4E-04        | 4.83        |      |
|                          | 3-hydroxybutyric acid      | 6.97E-04                                              | 5.59        | 4.6E-03        | 3.06        |      |
|                          | cysteine                   | 2.21E-02                                              | 3.36        | 1.1E-02        | 2.53        |      |
|                          | citrulline                 | 4.82E-02                                              | 2.02        | 7.1E-03        | 2.49        |      |
|                          | 2-hydroxybutanoic acid     | 4.16E-06                                              | 3.87        | 1.7E-02        | 2.06        |      |
|                          | phosphoenolpyruvate        | 4.50E-02                                              | 1.53        | 4.3E-02        | 1.77        |      |
|                          | oleic acid                 | 1.39E-02                                              | 1.57        | 3.3E-02        | 1.74        |      |
|                          | linoleic acid              | 9.05E-03                                              | 1.46        | 4.3E-02        | 1.60        |      |
|                          | tryptophan                 | 3.06E-04                                              | 1.73        | 7.6E-03        | 1.57        |      |
|                          | itaconic acid              | 2.27E-05                                              | 2.77        | 6.5E-03        | 1.56        |      |
|                          | N-acetyl-D-tryptophan      | 3.05E-04                                              | 2.53        | 3.3E-02        | 1.52        |      |
|                          | isoleucine                 | 2.94E-03                                              | 0.64        | 2.5E-02        | 0.71        |      |
|                          | 1-monoolein                | 4.93E-02                                              | 0.71        | 5.6E-03        | 0.53        |      |
|                          | 4-hydroxyphenylacetic acid | 2.18E-02                                              | 0.49        | 2.5E-02        | 0.49        |      |
|                          | capric acid                | 7.52E-03                                              | 0.57        | 2.3E-03        | 0.42        |      |
|                          | adipic acid                | 3.14E-02                                              | 0.55        | 1.5E-02        | 0.42        |      |
|                          | methionine sulfoxide       | 3.00E-02                                              | 0.51        | 1.3E-02        | 0.36        |      |
|                          | Liver                      | 2-aminobutyric acid                                   | 2.89E-05    | 2.83           | 3.9E-04     | 3.15 |
|                          |                            | 3-hydroxybutyric acid                                 | 2.41E-04    | 3.69           | 2.8E-04     | 2.85 |
|                          |                            | adenosine                                             | 1.65E-03    | 1.82           | 5.0E-02     | 2.40 |
| phosphoethanolamine      |                            | 6.89E-03                                              | 1.58        | 2.7E-03        | 2.38        |      |
| inosine 5'-monophosphate |                            | 2.47E-03                                              | 2.41        | 4.0E-02        | 1.77        |      |
| 5-methoxytryptamine      |                            | 4.51E-02                                              | 1.28        | 3.2E-02        | 1.70        |      |
| UDP-glucuronic acid      |                            | 1.87E-04                                              | 1.77        | 2.7E-02        | 1.59        |      |
| saccharic acid           |                            | 7.37E-03                                              | 1.30        | 1.0E-02        | 1.42        |      |
| indole-3-lactate         |                            | 1.96E-02                                              | 1.33        | 2.3E-02        | 1.28        |      |
| cholesterol              |                            | 6.18E-03                                              | 1.26        | 4.9E-03        | 1.24        |      |
| tyrosine                 | 2.08E-02                   | 0.78                                                  | 1.8E-02     | 0.78           |             |      |
| histidine                | 2.36E-02                   | 0.64                                                  | 1.9E-02     | 0.61           |             |      |
| urea                     | 3.21E-04                   | 0.60                                                  | 2.3E-04     | 0.55           |             |      |
| alpha-aminoadipic acid   | 1.51E-02                   | 0.51                                                  | 2.1E-02     | 0.51           |             |      |
| tartaric acid            | 6.19E-03                   | 0.36                                                  | 3.3E-03     | 0.30           |             |      |

Supplementary Table 3. Metabolites implicated in the ‘Metabolic Memory of Fasting’ in the serum and liver of mice fed SD and HFD.

|                          |                            | Preserved under fasting and RF conditions |           |                 |           |
|--------------------------|----------------------------|-------------------------------------------|-----------|-----------------|-----------|
|                          |                            | LCC vs. SD                                |           | LCC-RF vs. SD   |           |
| <i>Biological Sample</i> | <i>Metabolite</i>          | <i>raw.pval</i>                           | <i>FC</i> | <i>raw.pval</i> | <i>FC</i> |
| Serum                    | 3-hydroxybutyric acid      | 1.59E-04                                  | 14.04     | 5.97E-03        | 4.72      |
| Serum                    | 2-hydroxybutanoic acid     | 1.58E-05                                  | 3.26      | 2.56E-02        | 2.97      |
| Serum                    | 2-aminobutyric acid        | 2.44E-03                                  | 2.40      | 4.68E-02        | 2.24      |
| Serum                    | lauric acid                | 1.18E-02                                  | 2.65      | 1.50E-02        | 2.07      |
| Serum                    | glycolic acid              | 3.15E-03                                  | 1.48      | 5.76E-03        | 1.68      |
| Serum                    | 2-hydroxyglutaric acid     | 9.50E-03                                  | 1.37      | 9.35E-03        | 1.66      |
| Serum                    | conduiritol-beta-expoxide  | 4.59E-04                                  | 2.79      | 4.48E-03        | 1.60      |
| Serum                    | pantothenic acid           | 5.54E-05                                  | 2.29      | 4.60E-03        | 1.59      |
| Serum                    | 2-hydroxyhexanoic acid     | 3.91E-03                                  | 1.34      | 1.54E-02        | 1.57      |
| Serum                    | tocopherol alpha-          | 3.23E-02                                  | 0.56      | 4.36E-02        | 1.57      |
| Serum                    | xylose                     | 3.30E-02                                  | 1.40      | 3.42E-02        | 1.54      |
| Serum                    | fucose                     | 5.86E-03                                  | 1.63      | 4.31E-02        | 1.51      |
| Serum                    | oxalic acid                | 2.81E-03                                  | 1.45      | 1.65E-02        | 1.25      |
| Serum                    | valine                     | 8.28E-05                                  | 0.48      | 3.89E-02        | 0.74      |
| Serum                    | alanine                    | 1.30E-03                                  | 0.60      | 2.68E-02        | 0.72      |
| Serum                    | methionine                 | 7.30E-03                                  | 0.41      | 3.69E-02        | 0.49      |
| Liver                    | 2-aminobutyric acid        | 3.06E-03                                  | 2.51      | 1.63E-02        | 2.84      |
| Liver                    | 3-hydroxybutyric acid      | 1.82E-06                                  | 4.86      | 3.39E-02        | 2.25      |
| Liver                    | guanosine                  | 3.60E-05                                  | 1.61      | 4.09E-02        | 1.66      |
| Liver                    | 1-monostearin              | 7.58E-03                                  | 1.66      | 1.60E-02        | 1.53      |
| Liver                    | cholesterol                | 4.80E-04                                  | 1.51      | 4.06E-02        | 1.28      |
| Liver                    | xylose                     | 3.92E-02                                  | 1.24      | 2.60E-02        | 1.25      |
| Liver                    | 2,5-dihydroxypyrazine NIST | 1.77E-02                                  | 0.74      | 4.31E-02        | 0.72      |
| Liver                    | pipecolinic acid           | 1.05E-02                                  | 0.68      | 3.52E-02        | 0.72      |
| Liver                    | glucose-1-phosphate        | 5.42E-03                                  | 0.67      | 3.78E-02        | 0.66      |
| Liver                    | glutaric acid              | 6.27E-04                                  | 0.61      | 2.10E-02        | 0.63      |
| Liver                    | arabitol                   | 1.52E-05                                  | 0.44      | 3.60E-03        | 0.57      |
| Liver                    | glutathione                | 3.24E-04                                  | 0.35      | 1.98E-02        | 0.50      |
| Liver                    | alpha-aminoadipic acid     | 1.02E-03                                  | 0.31      | 2.72E-02        | 0.41      |
| Liver                    | galactose-6-phosphate      | 2.59E-03                                  | 0.54      | 1.96E-03        | 0.36      |

|                          |                           | Preserved under fasting and RF conditions |           |                 |           |
|--------------------------|---------------------------|-------------------------------------------|-----------|-----------------|-----------|
|                          |                           | FMD vs. SD                                |           | FMD-RF vs. SD   |           |
| <i>Biological Sample</i> | <i>Metabolite</i>         | <i>raw.pval</i>                           | <i>FC</i> | <i>raw.pval</i> | <i>FC</i> |
| Serum                    | conduiritol-beta-expoxide | 4.02E-09                                  | 27.41     | 2.58E-06        | 7.27      |
| Serum                    | hexitol                   | 1.28E-09                                  | 14.65     | 1.86E-02        | 3.13      |
| Serum                    | glucose-6-phosphate       | 1.32E-03                                  | 0.31      | 1.91E-02        | 2.25      |
| Serum                    | uric acid                 | 4.97E-03                                  | 1.32      | 3.96E-02        | 1.34      |
| Serum                    | glyceric acid             | 1.59E-02                                  | 1.36      | 3.19E-02        | 1.31      |
| Liver                    | conduiritol-beta-expoxide | 7.11E-05                                  | 12.54     | 1.79E-04        | 4.22      |
| Liver                    | glycyl proline            | 2.78E-02                                  | 1.78      | 1.58E-02        | 1.79      |

|                          |                   | Preserved under fasting and RF conditions |           |                    |           |
|--------------------------|-------------------|-------------------------------------------|-----------|--------------------|-----------|
|                          |                   | HFD+LCC vs. HFD                           |           | HFD+LCC-RF vs. HFD |           |
| <i>Biological Sample</i> | <i>Metabolite</i> | <i>raw.pval</i>                           | <i>FC</i> | <i>raw.pval</i>    | <i>FC</i> |
| Liver                    | adenosine         | 1.65E-03                                  | 1.82      | 7.32E-03           | 1.80      |
| Liver                    | pantothenic acid  | 4.95E-03                                  | 1.59      | 7.95E-03           | 1.41      |
| Liver                    | fumaric acid      | 3.67E-02                                  | 0.60      | 2.36E-02           | 0.42      |
| Liver                    | malic acid        | 4.43E-03                                  | 0.44      | 8.31E-03           | 0.34      |

|                          |                           | Preserved under fasting and RF conditions |           |                    |           |
|--------------------------|---------------------------|-------------------------------------------|-----------|--------------------|-----------|
|                          |                           | HFD+FMD vs. HFD                           |           | HFD+FMD-RF vs. HFD |           |
| <i>Biological Sample</i> | <i>Metabolite</i>         | <i>raw.pval</i>                           | <i>FC</i> | <i>raw.pval</i>    | <i>FC</i> |
| Serum                    | hexitol                   | 2.96E-03                                  | 7.79      | 1.99E-04           | 3.67      |
| Serum                    | conduiritol-beta-expoxide | 1.08E-05                                  | 10.20     | 5.43E-04           | 3.48      |
| Serum                    | cysteine                  | 1.06E-02                                  | 2.53      | 4.65E-02           | 1.71      |
| Liver                    | conduiritol-beta-expoxide | 3.13E-05                                  | 11.32     | 8.91E-07           | 3.31      |
| Liver                    | hexitol                   | 6.75E-06                                  | 8.04      | 2.38E-07           | 2.55      |



Supplementary Table 4. Pathway analysis of shared metabolites in the liver of fasted and refed mice under the indicated experimental conditions.

| SD context                                                                              |                                             |       |          |      |          |        |             |       |        |
|-----------------------------------------------------------------------------------------|---------------------------------------------|-------|----------|------|----------|--------|-------------|-------|--------|
| Shared hepatic metabolites between LCC and FMD vs SD controls (Central Core of Fasting) |                                             |       |          |      |          |        |             |       |        |
|                                                                                         | Pathway                                     | Total | Expected | Hits | Raw p    | LOG(p) | Holm adjust | FDR   | Impact |
| UPMODULATED                                                                             | Purine metabolism                           | 66    | 0.482    | 5    | 5.24E-05 | 9.86   | 0.004       | 0.004 | 0.179  |
|                                                                                         | Ascorbate and aldarate metabolism           | 10    | 0.073    | 2    | 2.12E-03 | 6.16   | 0.176       | 0.089 | 0.250  |
|                                                                                         | Steroid biosynthesis                        | 42    | 0.307    | 2    | 3.56E-02 | 3.34   | 1           | 0.757 | 0.056  |
|                                                                                         | Synthesis and degradation of ketone bodies  | 5     | 0.037    | 1    | 3.60E-02 | 3.32   | 1           | 0.757 | 0.000  |
|                                                                                         | Butanoate metabolism                        | 15    | 0.110    | 1    | 0.105    | 2.26   | 1           | 1     | 0.000  |
|                                                                                         | Pentose and glucuronate interconversions    | 18    | 0.131    | 1    | 0.124    | 2.09   | 1           | 1     | 0.125  |
|                                                                                         | Sphingolipid metabolism                     | 21    | 0.153    | 1    | 0.144    | 1.94   | 1           | 1     | 0.014  |
|                                                                                         | Galactose metabolism                        | 27    | 0.197    | 1    | 0.181    | 1.71   | 1           | 1     | 0.000  |
|                                                                                         | Phosphatidylinositol signaling system       | 28    | 0.205    | 1    | 0.187    | 1.68   | 1           | 1     | 0.037  |
|                                                                                         | Inositol phosphate metabolism               | 30    | 0.219    | 1    | 0.199    | 1.61   | 1           | 1     | 0.129  |
|                                                                                         | Glycerophospholipid metabolism              | 36    | 0.263    | 1    | 0.234    | 1.45   | 1           | 1     | 0.024  |
|                                                                                         | Amino sugar and nucleotide sugar metabolism | 37    | 0.270    | 1    | 0.240    | 1.43   | 1           | 1     | 0.017  |
|                                                                                         | Primary bile acid biosynthesis              | 46    | 0.336    | 1    | 0.290    | 1.24   | 1           | 1     | 0.033  |
|                                                                                         | Steroid hormone biosynthesis                | 77    | 0.562    | 1    | 0.440    | 0.82   | 1           | 1     | 0.007  |
| DOWNMODULATED                                                                           | Glutathione metabolism                      | 28    | 0.260    | 3    | 1.83E-03 | 6.30   | 0.154       | 0.154 | 0.352  |
|                                                                                         | Primary bile acid biosynthesis              | 46    | 0.428    | 2    | 6.58E-02 | 2.72   | 1           | 1     | 0.045  |
|                                                                                         | Taurine and hypotaurine metabolism          | 8     | 0.074    | 1    | 7.22E-02 | 2.63   | 1           | 1     | 0.429  |
|                                                                                         | Arginine biosynthesis                       | 14    | 0.130    | 1    | 0.123    | 2.10   | 1           | 1     | 0.000  |
|                                                                                         | Butanoate metabolism                        | 15    | 0.139    | 1    | 0.131    | 2.03   | 1           | 1     | 0.000  |
|                                                                                         | Lysine degradation                          | 25    | 0.232    | 1    | 0.210    | 1.56   | 1           | 1     | 0.141  |
|                                                                                         | Galactose metabolism                        | 27    | 0.251    | 1    | 0.225    | 1.49   | 1           | 1     | 0.034  |
|                                                                                         | Porphyrin and chlorophyll metabolism        | 30    | 0.279    | 1    | 0.246    | 1.40   | 1           | 1     | 0.000  |
|                                                                                         | Glyoxylate and dicarboxylate metabolism     | 32    | 0.297    | 1    | 0.261    | 1.34   | 1           | 1     | 0.106  |
|                                                                                         | Glycine, serine and threonine metabolism    | 34    | 0.316    | 1    | 0.275    | 1.29   | 1           | 1     | 0.271  |
|                                                                                         | Arachidonic acid metabolism                 | 36    | 0.335    | 1    | 0.288    | 1.24   | 1           | 1     | 0.000  |
|                                                                                         | Amino sugar and nucleotide sugar metabolism | 37    | 0.344    | 1    | 0.295    | 1.22   | 1           | 1     | 0.017  |
|                                                                                         | Aminoacyl-tRNA biosynthesis                 | 48    | 0.446    | 1    | 0.366    | 1.01   | 1           | 1     | 0.000  |
|                                                                                         | Purine metabolism                           | 66    | 0.614    | 1    | 0.468    | 0.76   | 1           | 1     | 0.000  |

| SD context                                                                          |                                            |                    |          |       |          |          |             |       |        |
|-------------------------------------------------------------------------------------|--------------------------------------------|--------------------|----------|-------|----------|----------|-------------|-------|--------|
| Shared hepatic metabolites between LCC and LCC-RF vs SD controls (Metabolic Memory) |                                            |                    |          |       |          |          |             |       |        |
|                                                                                     | Pathway                                    | Total              | Expected | Hits  | Raw p    | LOG(p)   | Holm adjust | FDR   | Impact |
| UP                                                                                  | Synthesis and degradation of ketone bodies | 5                  | 0.017    | 1     | 1.65E-02 | 4.10     | 1           | 1     | 0      |
|                                                                                     | Butanoate metabolism                       | 15                 | 0.050    | 1     | 4.89E-02 | 3.02     | 1           | 1     | 0      |
|                                                                                     | Pentose and glucuronate interconversions   | 18                 | 0.060    | 1     | 5.84E-02 | 2.84     | 1           | 1     | 0.078  |
|                                                                                     | Cysteine and methionine metabolism         | 33                 | 0.110    | 1     | 0.105    | 2.25     | 1           | 1     | 0.042  |
|                                                                                     | Steroid biosynthesis                       | 42                 | 0.139    | 1     | 0.132    | 2.02     | 1           | 1     | 0.028  |
|                                                                                     | Primary bile acid biosynthesis             | 46                 | 0.153    | 1     | 0.144    | 1.94     | 1           | 1     | 0.033  |
|                                                                                     | Purine metabolism                          | 66                 | 0.219    | 1     | 0.201    | 1.60     | 1           | 1     | 0      |
|                                                                                     | Steroid hormone biosynthesis               | 77                 | 0.256    | 1     | 0.231    | 1.47     | 1           | 1     | 0.007  |
|                                                                                     | DOWN                                       | Lysine degradation | 25       | 0.133 | 2        | 6.97E-03 | 4.97        | 0.586 | 0.586  |
| Galactose metabolism                                                                |                                            | 27                 | 0.143    | 1     | 0.135    | 2.00     | 1           | 1     | 0.034  |
| Glutathione metabolism                                                              |                                            | 28                 | 0.149    | 1     | 0.140    | 1.97     | 1           | 1     | 0.256  |
| Amino sugar and nucleotide sugar metabolism                                         |                                            | 37                 | 0.197    | 1     | 0.181    | 1.71     | 1           | 1     | 0.017  |

| Shared hepatic metabolites between FMD and FMD-RF vs SD controls (Metabolic Memory) |         |       |          |      |       |        |             |     |        |
|-------------------------------------------------------------------------------------|---------|-------|----------|------|-------|--------|-------------|-----|--------|
|                                                                                     | Pathway | Total | Expected | Hits | Raw p | LOG(p) | Holm adjust | FDR | Impact |
| UP                                                                                  |         |       |          |      |       |        |             |     | N/A    |
| DOWN                                                                                |         |       |          |      |       |        |             |     | N/A    |

**HFD context**

| <i>Shared hepatic metabolites between HFD+LCC and HFD+FMD vs HFD controls (Central Core of Fasting)</i> |                                                     |          |       |       |          |             |       |        |       |
|---------------------------------------------------------------------------------------------------------|-----------------------------------------------------|----------|-------|-------|----------|-------------|-------|--------|-------|
| Pathway                                                                                                 | Total                                               | Expected | Hits  | Raw p | LOG(p)   | Holm adjust | FDR   | Impact |       |
| UPMODULATED                                                                                             | Ascorbate and aldarate metabolism                   | 10       | 0.066 | 2     | 1.74E-03 | 6.36        | 0.146 | 0.146  | 0.250 |
|                                                                                                         | Synthesis and degradation of ketone bodies          | 5        | 0.033 | 1     | 3.28E-02 | 3.42        | 1     | 1      | 0.000 |
|                                                                                                         | Purine metabolism                                   | 66       | 0.438 | 2     | 6.78E-02 | 2.69        | 1     | 1      | 0.126 |
|                                                                                                         | Butanoate metabolism                                | 15       | 0.100 | 1     | 0.096    | 2.35        | 1     | 1      | 0.000 |
|                                                                                                         | Pentose and glucuronate interconversions            | 18       | 0.120 | 1     | 0.114    | 2.17        | 1     | 1      | 0.125 |
|                                                                                                         | Sphingolipid metabolism                             | 21       | 0.139 | 1     | 0.131    | 2.03        | 1     | 1      | 0.014 |
|                                                                                                         | Cysteine and methionine metabolism                  | 33       | 0.219 | 1     | 0.199    | 1.61        | 1     | 1      | 0.042 |
|                                                                                                         | Glycerophospholipid metabolism                      | 36       | 0.239 | 1     | 0.215    | 1.53        | 1     | 1      | 0.024 |
|                                                                                                         | Amino sugar and nucleotide sugar metabolism         | 37       | 0.246 | 1     | 0.221    | 1.51        | 1     | 1      | 0.017 |
|                                                                                                         | Steroid biosynthesis                                | 42       | 0.279 | 1     | 0.247    | 1.40        | 1     | 1      | 0.028 |
|                                                                                                         | Primary bile acid biosynthesis                      | 46       | 0.305 | 1     | 0.267    | 1.32        | 1     | 1      | 0.033 |
|                                                                                                         | Steroid hormone biosynthesis                        | 77       | 0.511 | 1     | 0.409    | 0.89        | 1     | 1      | 0.007 |
| DOWNMODULATED                                                                                           | Aminoacyl-tRNA biosynthesis                         | 48       | 0.159 | 2     | 9.36E-03 | 4.67        | 0.786 | 0.556  | 0.000 |
|                                                                                                         | Phenylalanine, tyrosine and tryptophan biosynthesis | 4        | 0.013 | 1     | 1.32E-02 | 4.33        | 1     | 0.556  | 0.500 |
|                                                                                                         | Ubiquinone and other terpenoid-quinone biosynthesis | 9        | 0.030 | 1     | 2.96E-02 | 3.52        | 1     | 0.729  | 0.000 |
|                                                                                                         | Phenylalanine metabolism                            | 12       | 0.040 | 1     | 3.93E-02 | 3.24        | 1     | 0.729  | 0.000 |
|                                                                                                         | Arginine biosynthesis                               | 14       | 0.046 | 1     | 4.57E-02 | 3.09        | 1     | 0.729  | 0.000 |
|                                                                                                         | Histidine metabolism                                | 16       | 0.053 | 1     | 5.21E-02 | 2.96        | 1     | 0.729  | 0.221 |
|                                                                                                         | beta-Alanine metabolism                             | 21       | 0.070 | 1     | 6.79E-02 | 2.69        | 1     | 0.815  | 0.000 |
|                                                                                                         | Lysine degradation                                  | 25       | 0.083 | 1     | 8.04E-02 | 2.52        | 1     | 0.844  | 0.141 |
|                                                                                                         | Tyrosine metabolism                                 | 42       | 0.139 | 1     | 0.132    | 2.02        | 1     | 1      | 0.140 |
|                                                                                                         | Purine metabolism                                   | 66       | 0.219 | 1     | 0.201    | 1.60        | 1     | 1      | 0.000 |

**HFD context**

| <i>Shared hepatic metabolites between HFD+LCC and HFD+LCC-RF vs HFD controls (Metabolic Memory)</i> |                                             |          |       |          |          |             |       |        |       |
|-----------------------------------------------------------------------------------------------------|---------------------------------------------|----------|-------|----------|----------|-------------|-------|--------|-------|
| Pathway                                                                                             | Total                                       | Expected | Hits  | Raw p    | LOG(p)   | Holm adjust | FDR   | Impact |       |
| UP                                                                                                  | Pantothenate and CoA biosynthesis           | 19       | 0.025 | 1        | 2.51E-02 | 3.69        | 1     | 1      | 0.007 |
|                                                                                                     | Purine metabolism                           | 66       | 0.088 | 1        | 0.086    | 2.46        | 1     | 1      | 0.001 |
| DOWN                                                                                                | Citrate cycle (TCA cycle)                   | 20       | 0.027 | 2        | 1.68E-04 | 8.69        | 0.014 | 0.009  | 0.074 |
|                                                                                                     | Pyruvate metabolism                         | 22       | 0.029 | 2        | 2.04E-04 | 8.50        | 0.017 | 0.009  | 0.031 |
|                                                                                                     | Arginine biosynthesis                       | 14       | 0.019 | 1        | 1.85E-02 | 3.99        | 1     | 0.518  | 0.000 |
|                                                                                                     | Alanine, aspartate and glutamate metabolism | 28       | 0.037 | 1        | 3.69E-02 | 3.30        | 1     | 0.707  | 0.002 |
|                                                                                                     | Glyoxylate and dicarboxylate metabolism     | 32       | 0.042 | 1        | 4.21E-02 | 3.17        | 1     | 0.707  | 0.000 |
| Tyrosine metabolism                                                                                 | 42                                          | 0.056    | 1     | 5.50E-02 | 2.90     | 1           | 0.770 | 0.025  |       |

| <i>Shared hepatic metabolites between HFD+FMD and HFD+FMD-RF vs HFD controls (Metabolic Memory)</i> |       |          |      |       |        |             |     |        |  |
|-----------------------------------------------------------------------------------------------------|-------|----------|------|-------|--------|-------------|-----|--------|--|
| Pathway                                                                                             | Total | Expected | Hits | Raw p | LOG(p) | Holm adjust | FDR | Impact |  |
| UP                                                                                                  | N/A   |          |      |       |        |             |     |        |  |
| DOWN                                                                                                | N/A   |          |      |       |        |             |     |        |  |

Supplementary Table 5. Composition of the SD and HFD diets

| Ingredients (g.kg <sup>-1</sup> ) | SD (AIN-93G) | HFD (High fat AIN-93G) |
|-----------------------------------|--------------|------------------------|
| Casein, High Nitrogen             | 200          | 213                    |
| L-cysteine                        | 3            | 3.0                    |
| Soy protein isolate               | -            | 103                    |
| Sucrose                           | 100          | -                      |
| Cornstarch                        | 397.486      | 127.1                  |
| Dextrose                          | 132          | -                      |
| Maltodextrin                      | -            | 62.1                   |
| Soybean Oil                       | 70           | 43.009                 |
| Hydrogenated Coconut Oil          | -            | 294                    |
| DL-Methionine                     | -            | 3.0                    |
| t-Butyl hydroquinone              | 0.014        | -                      |
| Cellulose                         | 50           | 66.141                 |
| Mineral Mix#210025                | 35           | -                      |
| Mineral Mix#213036                | -            | 35                     |
| Vitamin Mix#310025                | 10           | 16.61                  |
| Calcium Phosphate, dibasic        | -            | 25.14                  |
| Calcium Carbonate                 | -            | 4.9                    |
| Choline Bitartrate                | 2.5          | 4.0                    |
